# Palaeobiological inferences based on long bone epiphyseal and diaphyseal structure - the forelimb of xenarthrans (Mammalia)

Eli Amson<sup>1,2</sup>, John A Nyakatura<sup>2</sup>

<sup>1</sup>Museum für Naturkunde, Leibniz-Institut für Evolutions- und Biodiversitätsforschung, Berlin, Germany; [eli.amson@mfk-berlin.de](mailto:eli.amson@mfk-berlin.de)

<sup>2</sup>AG Morphologie und Formengeschichte, Institut für Biologie & Bild Wissen Gestaltung. Ein interdisziplinäres Labor, Humboldt-Universität, Berlin, Germany; [eli.amson@hu-berlin.de](mailto:eli.amson@hu-berlin.de)

## ORCID

0000-0003-1474-9613 (Eli Amson)

0000-0001-8088-8684 (John A Nyakatura)

## ABSTRACT

Trabecular architecture (i.e., the main orientation of the bone trabeculae, their number, mean thickness, spacing, etc.) has been shown experimentally to adapt with extreme accuracy and sensitivity to the loadings applied to the bone during life. However, the potential of trabecular parameters used as a proxy for the mechanical environment of an organism's organ to help reconstruct the lifestyle of extinct taxa has only recently started to be exploited. Furthermore, these parameters are rarely combined to the long-used mid-diaphyseal parameters to inform such reconstructions. Here we investigate xenarthrans, for which functional and ecological reconstructions of extinct forms are particularly important in order to inform our macroevolutionary understanding of their main constitutive clades, i.e., the Tardigrada (sloths), Vermilingua (anteaters), and Cingulata (armadillos and extinct close relatives). The lifestyles of modern xenarthrans can be classified as fully terrestrial and highly fossorial (armadillos), arboreal (partly to fully) and hook-and-pull digging (anteaters), or suspensory (fully arboreal) and non-fossorial (sloths). The degree of arboreality and fossoriality of some extinct forms, "ground sloths" in particular, is highly debated. We used high-resolution computed tomography to compare the epiphyseal 3D architecture and mid-diaphyseal structure of the forelimb bones of extant and extinct xenarthrans. The comparative approach employed aims at inferring the most probable lifestyle of extinct taxa, using a phylogenetically informed discriminant analysis. Several challenges preventing the attribution of one of the extant xenarthran lifestyles to the sampled extinct sloths were identified. Differing from that of the larger "ground sloths", the bone structure of the small-sized *Hapalops* (Miocene of Argentina), however, was found as significantly more similar to that of extant sloths, even when accounting for the phylogenetic signal.

Keywords: Bone structure; Forelimb; Locomotion; Palaeobiological inferences; Trabeculae; Xenarthra

## 1 INTRODUCTION

2 Bone structure is intensively studied in  
3 analyses concerned with functional anatomy  
4 because it is argued to be extremely plastic. While  
5 a genetic blueprint influences bone structure, it has  
6 been shown to adapt during life (and especially at  
7 an early ontogenetic stage) to its mechanical  
8 environment (Ruff et al. 2006). This was argued for

9 trabecular bone, which reacts to loading with great  
10 accuracy and sensitivity (Barak et al. 2011). This  
11 was also argued for cortical bone, even though the  
12 latter is expected to be less plastic, at least in part  
13 due to its lower remodeling rate (see review of  
14 Kivell, 2016). Comparative studies focusing on  
15 either trabeculae or cortical structure intend to  
16 leverage this great plasticity to associate structural  
17 phenotypes to lifestyles or functional uses of a  
18 limb. This has been achieved in some analyses (as

PREPRINT

19 recently exemplified by Georgiou et al. 2018; Ryan  
20 et al. 2018; Tsegai et al. 2018) but not all of them  
21 (see review of Kivell 2016), suggesting that some  
22 confounding factors are likely to be at play, and  
23 more generally that the approach is limited. For  
24 trabecular bone in particular, important  
25 intraspecific variation has been documented (e.g.,  
26 in *Pongo*; Tsegai et al. 2013; Georgiou et al.  
27 2018). Nevertheless, the fact that some analyses  
28 successfully distinguished ecological groups might  
29 indicate that broad differences of bone structure  
30 among lifestyles can exceed, at least in some  
31 cases, individual variability. Because fossil bone  
32 cross-sections at mid-diaphysis have been  
33 produced for over a century and a half (Kolb et al.  
34 2015), a large number of mid-diaphyseal data  
35 related to extinct taxa have been acquired, and  
36 successfully exploited for palaeobiological  
37 inferences (e.g., Germain & Laurin, 2005). Fossil  
38 three-dimensional (3D) trabecular architecture has  
39 been much less investigated, as, to our  
40 knowledge, only few studies have been published,  
41 which are all focussing on primates (DeSilva &  
42 Devlin 2012; Barak et al. 2013; Su et al. 2013;  
43 Skinner et al. 2015; Su & Carlson 2017; Ryan et al.  
44 2018).

45 In general terms, it is assumed that the  
46 diaphysis of long bones tends to be exposed to  
47 mostly bending and torsion, and to a lesser extent  
48 axial compression (Carter & Beaupré 2001). On  
49 the other hand, the architecture of epiphyseal  
50 trabeculae is usually related to compressive and  
51 tensile strains (Biewener et al. 1996; Pontzer et al.  
52 2006; Barak et al. 2011). Trabecular and cortical  
53 compartments are hence expected to have distinct  
54 mechanical properties, which do not necessarily  
55 co-vary. To combine them in a single analysis, it  
56 can therefore be argued that the structural  
57 parameters deriving from these two types of  
58 structures should be considered as distinct  
59 (univariate) variables. Because trabecular and  
60 cortical structure have yielded a functional signal,  
61 such a combined analysis could potentially help in  
62 our endeavours to associate a bone overall  
63 structure to a loading regime, and, eventually, a  
64 function. This combined analysis has previously  
65 been achieved, on extant taxa, via different  
66 approaches. Based on epiphyseal regions of  
67 interest (ROIs) and mid-diaphyseal sections, Shaw  
68 & Ryan (2012) examined both compartments in the  
69 humerus and femur of anthropoids (see also  
70 Lazenby et al. (2008) for handedness within  
71 humans). They measured individual trabecular and  
72 mid-diaphyseal parameters, but did not combine  
73 the latter in a single test. Another approach,  
74 termed 'holistic analysis' (Gross et al. 2014), was  
75 used in *Pan* and *Homo* whole bones or epiphyses,  
76 but parameters were not used conjointly to

77 discriminate functional groups in the statistical  
78 assessment either. It is noteworthy, however, that  
79 Tsegai et al. (2017), also used this holistic analysis  
80 and performed a Principal Component Analysis  
81 (even though in that case the focus was on cortical  
82 bone thickness at the articular surface). Skinner et  
83 al. (2015) and Stephens et al. (2016) also used  
84 Gross et al. (2014)'s method, but focused on  
85 trabecular architecture only. This approach is  
86 particularly relevant for medium- to large-sized  
87 mammals such as *Pan* or *Homo*, for which the  
88 epiphyses include a complex trabecular  
89 architecture with distinct zones of different  
90 arrangement (such as the so-called vertical and  
91 horizontal trabecular columns in the femoral neck;  
92 Hammer 2010). One can note that an entirely  
93 different approach, not relying on the  
94 measurement of these parameters, but on micro-  
95 finite element analysis, was also applied to a  
96 primate (Huynh Nguyen et al. 2014). To our  
97 knowledge, epiphyseal trabecular and mid-  
98 diaphyseal parameters have never been combined  
99 in a functional analysis about non-primate taxa,  
100 and no analysis used both trabecular and cross-  
101 sectional parameters in the same discriminant test.

102 References to bone structure in "ground sloths",  
103 *Megatherium* in particular, date back to the 19th  
104 century (Owen 1861). But it is only fairly recently  
105 that quantification of such a structure was  
106 performed (Straehl et al. 2013; see review of  
107 Amson & Nyakatura 2017). Straehl et al. (2013)  
108 examined compactness profile of a mid-diaphyseal  
109 section in various extant and extinct xenarthrans.  
110 They found that most armadillos were  
111 characterized by a humeral mid-diaphysis that is  
112 relatively more compact than that of the femur.  
113 Subsequently, Amson et al. (2017a) studied the  
114 epiphyseal trabecular architecture in extant  
115 xenarthrans, and found that some parameters, the  
116 degree of anisotropy (DA) in particular, differed  
117 among functional categories.

118 Indeed, xenarthrans are marked by distinct  
119 lifestyles that can be used to define functional  
120 categories. Extant xenarthrans were categorized  
121 by Amson et al. (2017a) as fully arboreal and non-  
122 fossorial (extant sloths), intermediate in both  
123 fossoriality and arboreality (anteaters), and fully  
124 terrestrial and fossorial (armadillos), and several  
125 fossorial classes were recognized among the  
126 latter. Partly following their expectations, Amson et  
127 al. (2017a) recovered that the armadillos (and in  
128 particular the more highly fossorial ones) differ in  
129 their greater DA for instance, which can be  
130 expected to be associated with the presence of  
131 one main loading direction (as opposed to various  
132 equally marked directions). Similarly, for mid-  
133 diaphyseal structure, one could expect those taxa

## PREPRINT

134 of which the long bone in question experiences  
135 one main bending direction to be characterized by  
136 a more elliptical cross-sectional shape (CSS, see  
137 below), with the section's major axis aligned along  
138 that direction (as the major axis indicates the  
139 direction of the greatest bending rigidity; Ruff &  
140 Hayes 1983). Because no significant differences  
141 were recovered in the mid-diaphyseal global  
142 compactness between fossorial and non-fossorial  
143 talpid moles (Meier et al. 2013), it seems that a  
144 simple relation between this parameter and a  
145 loading scheme associated with fossorial activity  
146 should not be expected (see also Straehl et al.  
147 2013).

148 For extant xenarthrans, the functional  
149 categories mentioned above mostly match the  
150 phylogeny, i.e., most categories are aggregated  
151 into clades. However, this is likely not true if one  
152 includes the extinct xenarthrans, the "ground  
153 sloths" in particular, because their lifestyle was  
154 interpreted as different from that of their closest  
155 relatives, the "tree sloths". Lifestyle reconstruction  
156 of extinct xenarthrans dates back to the 18th  
157 century (see review of Amson & Nyakatura 2017).  
158 Various methods were employed to infer the  
159 lifestyle of extinct xenarthrans. So far, they all  
160 relied on bone (and tooth) gross morphology,  
161 involving approaches such as comparative  
162 functional morphology (Amson et al. 2015),  
163 biomechanical modelling (Fariña & Blanco 1996)  
164 or muscle reconstruction (Toledo et al. 2013). This  
165 was found to be challenging, partly because of the  
166 lack of modern analogues for some taxa (Vizcaino  
167 et al. 2017), and partly because of the  
168 autapomorphic nature of several of the xenarthran  
169 traits (including that of extant taxa), which makes  
170 disentangling the phylogenetic and functional  
171 signals difficult (Amson et al. 2017a). Bone  
172 structure was argued to be extremely plastic, and  
173 found in xenarthrans in particular to be mostly  
174 devoid of phylogenetic signal (and when a  
175 significant signal is found, it is likely due to the  
176 matching between functional categories and  
177 clades; Amson et al. 2017a). The ecophenotypic  
178 nature of bone structure traits (which are defined  
179 as "biomechanically informative phenotypically  
180 plastic"; Ryan et al. 2018) is the rationale behind  
181 the present endeavour.

182 The aim of this study is to quantify bone  
183 diaphyseal and trabecular structure in "ground  
184 sloths" in order to infer their lifestyle. Given the  
185 disparate gross morphology of xenarthrans (e.g.,  
186 for the humerus, see Mielke et al. 2018a), we  
187 believe that studying easily comparable and  
188 arguably ecophenotypic traits such as bone  
189 structure parameters is highly relevant for this  
190 purpose. Extant sloths represent but a remnant of

191 the overall diversity of Tardigrada (also termed  
192 Folivora or Phyllophaga), and most likely acquired  
193 their highly derived lifestyle convergently  
194 (Nyakatura 2012; Coutier et al. 2017). The fossil  
195 record of early (Palaeocene-Eocene) xenarthrans  
196 and especially that of sloths, is rather poor (Gaudin  
197 & Croft 2015). It is therefore hard to reconstruct the  
198 ancestral lifestyle of Tardigrada, and more  
199 generally Xenarthra. To date, no extinct sloths  
200 have been reconstructed to have had a  
201 suspensory posture and locomotion resembling  
202 their extant kin (Pujos et al. 2012). But, because  
203 their gross anatomy was considered as similar to  
204 that of extant anteaters, Matthew (1912) argued  
205 that *Hapalops*, for instance, was partly arboreal.  
206 Such a lifestyle was of course not considered for  
207 larger taxa (but see translation of Lund in Owen  
208 (1839) for an early opposite view). However,  
209 digging capabilities, as well as bipedal stance  
210 and/or locomotion, was proposed for several  
211 medium-sized (e.g., *Glossotherium*) to giant-sized  
212 (e.g., *Megatherium*) "ground sloths" (Bargo et al.  
213 2000; Patiño & Fariña 2017). For the present  
214 analysis, we were able to sample small-sized as  
215 well as large-sized "ground sloths." The estimated  
216 body sizes of the latter exceed that of extant  
217 xenarthrans by two orders of magnitude (see  
218 below for body mass estimates). Because this has  
219 already been pointed out as a challenge for the  
220 reconstruction of extinct xenarthrans' lifestyles  
221 (Vizcaino et al. 2017), and because size might be  
222 correlated to at least some bone structure  
223 parameters, our approach also identified potential  
224 challenges inherent to the taxa and parameters we  
225 studied.

226

## 227 MATERIAL AND METHODS

### 228 Specimen and scanning procedure

229 The dataset of Amson et al. (2017a), which  
230 consists of extant skeletally mature wild-caught  
231 xenarthrans, was extended by several extinct  
232 sloths roughly spanning the whole body size range  
233 of the group: the small-sized (ca. 38 kg; Bargo et  
234 al. 2012) *Hapalops* sp., Ameghino, 1887 (Santa  
235 Cruz Formation, Early Miocene, ca. 17 Ma; Perkins  
236 et al. 2012), the medium-sized *Valgipes bucklandi*  
237 (ca. 200 kg (Smith et al. 2003); Lagoa Santa,  
238 Brazil, Pleistocene; the sampled specimen  
239 MNHN.F.BRD29 is labelled *Ocnopus gracilis*,  
240 which is now viewed as a junior synonym (Cartelle  
241 et al. 2009), *Scelidotherium leptcephalum* (ca.  
242 1000 kg; Vizcaino et al. 2006) and *Glossotherium*  
243 *robustum* [ca. 1200 kg (Vizcaino et al. 2006); both  
244 from 'Pampean', Argentina and Tarija, Bolivia, both



## PREPRINT

245 Pleistocene], as well as the large-sized *Lestodon*  
246 *armatus* [ca. 3200 kg (Vizcaíno et al. 2006);  
247 'Pampean', Argentina, Pleistocene] and  
248 *Megatherium americanum* [ca. 4000 kg (Fariña et  
249 al. 1998); 'Pampean', Argentina, Pleistocene]. The  
250 sampled specimens are skeletally mature (a few  
251 specimens showed a remnant of epiphyseal line,  
252 see below) and did not present apparent bone  
253 diseases (which were also criteria of selection for  
254 the extant species, see Amson et al. 2017a). All  
255 fossils were scanned (micro computed  
256 tomography,  $\mu$ CT) using a v|tome|x 240 L system  
257 (GE Sensing & Inspection Technologies Phoenix  
258 X|ray) at the AST-RX platform of the Museum  
259 national d'Histoire naturelle (Paris, France;  
260 <http://www.ums2700.mnhn.fr/ast-rx/ressources>).  
261 According to the methodology and results of  
262 Amson et al. (2017a), we focused our data  
263 acquisition of the trabecular parameters on the  
264 humeral head and radial trochlea regions of  
265 interest (ROIs; see below). Mid-diaphyseal  
266 parameters were acquired for these two bones and  
267 for the third metacarpal (Mc III) in all species, when  
268 available. See Table 1 for the list of skeletal  
269 elements sampled for each extinct species, along  
270 with ROIs for which data were successfully  
271 acquired (see also Amson et al. (2017a) for  
272 sample size and scanning procedure of the extant  
273 species). For the included specimens, scanning  
274 resolution ranged from 0.03 to 0.123 mm  
275 (depending on the size of the specimens). Relative  
276 resolution, used to assess if the employed  
277 resolution is adequate to analyse trabecular bone  
278 (mean trabecular thickness divided by resolution)  
279 ranged from 5.1 to 11.5 pixels/trabecula. This is  
280 considered as appropriate (Sode et al. 2008; Kivell  
281 et al. 2011; Mielke et al. 2018b). Scanning  
282 resolution (and relative resolution for the trabecular  
283 ROIs) for each specimen can be found in  
284 Supplementary Online Material (SOM) 1. For this  
285 first endeavour of palaeobiological reconstruction  
286 of "ground sloths" lifestyle based on bone  
287 diaphyseal and trabecular structure, we compared  
288 the parameters yielded by the fossils to those of  
289 the extant specimens, using the same lifestyle  
290 categories as defined by Amson et al. (2017a), i.e.,  
291 the fully arboreal extant sloths, intermediate  
292 anteaters, and fully terrestrial and fossorial  
293 armadillos.

294

### 295 **Qualitative observation of the** 296 **diaphyseal structure**

297 Raw image stacks were visualized with the Fiji  
298 package (ImageJ2 v. 1.51n and plugins; Schindelin  
299 et al. 2012, 2015; Schneider et al. 2012). The  
300 'Orthogonal Views' routine was used to compute

301 longitudinal sections. Sedimentary matrix  
302 prevented satisfying segmentation for some  
303 specimens but at least some qualitative  
304 observations were possible for all specimens (see  
305 Table 1).

### 306 **Trabecular parameters**

307 We followed the methodology of Amson et al.  
308 (2017a), which involves the use of the BoneJ  
309 plugin (Doube et al. 2010) for Fiji. In brief, bones  
310 were first placed in the same standard orientation.  
311 Then, ROIs were selected in the centre of the  
312 studied epiphyses, with the 'Fit Sphere' routine of  
313 BoneJ (see Amson et al. 2017a: fig. 2 and  
314 Additional files 3, 4). ROI were selected to be as  
315 large as possible but without including cortical  
316 bone. We used the 'Orthogonal Views' routine of  
317 Fiji to ascertain that the centre of the ROI was  
318 precisely located at the centre to the studied  
319 epiphysis along the mediolateral, anteroposterior,  
320 and proximodistal directions. The resulting  
321 substack was then thresholded ('Optimise  
322 Threshold> Threshold Only' routine) and purified  
323 ('Purify' routine). Finally, trabecular parameters  
324 were measured. Given the results of Amson et al.  
325 (2017a), we focused on the degree of anisotropy  
326 (DA), main direction of the trabeculae (MDT), bone  
327 volume fraction, BV/TV, connectivity density  
328 (Conn.D), trabecular mean thickness (Tb.Th),  
329 trabecular mean spacing (Tb.Sp), bone surface  
330 area (BS). Other trabecular parameters routinely  
331 acquired, however, can also be found in SOM 1.

332 For some specimens, the lack of contrast  
333 between bone and the sedimentary matrix  
334 prevented accurate bone segmentation (see Table  
335 1). Thresholding (see above) was successfully  
336 performed for the rest of the specimens; some of  
337 the latter, however, required manual removal of a  
338 few sedimentary particles (using the un-  
339 thresholded stack to recognize them).

340 The humerus of two specimens of *Hapalops*  
341 showed a slight remnant of epiphyseal line. A  
342 smaller ROI was hence defined to exclude this line  
343 (which would have biased the measurements) by  
344 cropping isometrically (in 3D) the substack (custom  
345 ImageJ script, SOM 2). The cropping coefficient  
346 (MNHN.F.SCZ162: 39%; MNHN.F.SCZ164: 72%)  
347 was then applied to the whole dataset and  
348 trabecular parameters were acquired anew. The  
349 means of the latter were compared to the initial  
350 parameters. For the dataset cropped at 72%,  
351 differences were found as minor (similar MDT;  
352  $\Delta$ DA = 3%;  $\Delta$ BV/TV < 1%;  $\Delta$ ConnD < 1%), while for  
353 the dataset cropped at 39%, differences were  
354 more important (MDT of opposing direction;  $\Delta$ DA,  
355 13%;  $\Delta$ BV/TV = 2%;  $\Delta$ ConnD, 4%). Exceeding a  
356 difference of 5% for at least one parameter value,

## PREPRINT

357 we did not analyse further the latter dataset (and  
358 excluded MNHN.F.SCZ162 from the analysis of  
359 trabecular architecture). A remnant of epiphyseal  
360 line was also observed in *Glossotherium robustum*  
361 MNHN.F.PAM756, but in its case only qualitative  
362 observations were made.

363

### 364 Mid-diaphyseal parameters

365 The same standardly oriented  $\mu$ CT-scan stacks  
366 (see above) were used for the acquisition of mid-  
367 diaphyseal parameters. Using Fiji, a cross-section  
368 was selected at mid-diaphysis; the latter was  
369 defined as the midpoint between most proximal  
370 and most distal points of either articular surfaces.  
371 Several sampled fossils did not preserve the mid-  
372 diaphysis. To compare them to the rest of the  
373 specimens, the latter were re-sampled at the level  
374 closest to mid-diaphysis preserved by each of  
375 those fossils (as assessed by superimposition with  
376 a complete specimen of the same species;  
377 MNHN.F.CSZ164 (humerus): 35% from proximal  
378 end; MNHN.F.CSZ166 (radius): 72% from the  
379 proximal end; see Table 1). Once the diaphyseal  
380 cross-sections were selected, they were  
381 thresholded automatically (see above), but we  
382 manually checked the resulting image, which, in a  
383 few instances, required a manual correction of the  
384 levels. The whole sectional area (WArea), global  
385 compactness (GC; both acquired with a custom  
386 ImageJ script, SOM 3), and cross-sectional  
387 parameters of the 'Slice Geometry' routine of  
388 BoneJ (Doube et al. 2010) were acquired. For the  
389 following analyses, we focused on cross-sectional  
390 area (CSA) and the ratio of second moment of  
391 area around major to minor axes ( $I_{max}/I_{min}$ ), also  
392 termed cross-sectional shape (CSS). If the ratio is  
393 close to one, CSS will usually be roughly circular.  
394 Values above one will entail increasingly elliptical  
395 shapes. The other diaphyseal parameters,  
396 however, can also be found in SOM 1. Because it  
397 is redundant with GC, CSA will only be used as a  
398 potential body size proxy (see below).

399

### 400 Statistics

401 The statistical analysis was performed using R  
402 version 3.4.3. Amson et al. (2017a) accounted for  
403 size effects by computing a phylogenetically  
404 informed linear regression for each parameter,  
405 against a size proxy. If the regression was found  
406 as significant, its residuals were used as the 'size-  
407 corrected' parameter. But the size of "ground  
408 sloths", well exceeding for most of them that of  
409 extant xenarthrans, could bias such a procedure.  
410 Indeed, the slightest error on the regression

411 coefficients estimation would likely involve  
412 drastically different residuals for those outlying  
413 taxa (see also Discussion). We therefore favoured,  
414 for the present analysis, to normalize those  
415 parameters that have a dimension by dividing the  
416 trait value by a body size proxy (raised to the same  
417 dimension). As body size proxies, we considered  
418 the specimen-specific TV (for trabecular  
419 parameters) and WArea (mid-diaphyseal  
420 parameters) or body mass (BM; species averages,  
421 because unknown for most collection specimens).  
422 Species body masses were taken from the AnAge  
423 database (Tacutu et al. 2013) and additional  
424 sources when necessary (Vizcaino et al. 1999;  
425 Hayssen 2010; Abba & Superina 2016; Smith &  
426 Owen 2017) for the extant species and from the  
427 specific sources mentioned above for the extinct  
428 taxa. The coefficient of determination of  
429 regressions against a parameter well known to  
430 correlate with size (Tb.Th for trabecular  
431 parameters and CSA for mid-diaphyseal  
432 parameters) indicated that BM was more  
433 representative of the sample variance for the  
434 trabecular parameters, while it was WArea in the  
435 case of mid-diaphyseal parameters. They were  
436 accordingly used as body size proxies in the  
437 subsequent analyses.

438 Besides univariate comparisons, we performed  
439 linear discriminant analyses to infer the most likely  
440 lifestyle of extinct species. Both trabecular and  
441 mid-diaphyseal parameters of the humerus and  
442 radius were conjointly used in these analyses  
443 (parameters from the Mc III were not included  
444 because of their lack of discrimination power, see  
445 Results). To account for the great body size  
446 disparity of the studied taxa, it is the 'size-  
447 normalized' parameters that were used (raw value  
448 divided by the relevant body size proxy if  
449 parameter not dimensionless, see above). One  
450 analysis per extinct taxon was performed, because  
451 we were not able to acquire all parameters for  
452 each of them (depending on the successfully  
453 processed skeletal elements and ROIs, see Table  
454 1). To phylogenetically inform these analyses, we  
455 used the function pFDA (Motani & Schmitz 2011;  
456 latest version available on  
457 [github.com/lrschmitz/phylo.fda](https://github.com/lrschmitz/phylo.fda)). This 'phylogenetic  
458 flexible discriminant analysis' uses the optimised  
459 value of Pagel's Lambda to account for the  
460 phylogenetic signal (Pagel 1999). As implemented  
461 here, the latter can span from 0 to 1, respectively  
462 denoting absence of phylogenetic signal and trait  
463 evolution consistent with a Brownian motion model  
464 of evolution. The rest of the pFDA works as a  
465 'traditional' discriminant analysis. The training data,  
466 stemming in our case from the extant xenarthrans,  
467 were classified according to the three main  
468 lifestyles, i.e., 'armadillo', 'anteater', and 'extant

## PREPRINT

469 sloth'. The test data relates to the sampled extinct  
470 sloths. If not already normally distributed (as  
471 indicated by a Shapiro test), the parameters were  
472 log-transformed (and Shapiro tests were run again  
473 to confirm normality). Collinear variables (highly  
474 correlated variables as indicated by a correlation  
475 above 0.9) were excluded.

476 The timetree used to phylogenetically inform  
477 the tests was based on that used by Amson et al  
478 (2017a) (which is based on Gibb et al. 2016), and  
479 was completed with the extinct taxa. The  
480 relationships between the main clades follow  
481 Amson et al. (2017b). The split between  
482 Mylodontidae (represented by *Lestodon*) and the  
483 other Eutardigrada (all sloths but *Bradypus*) was  
484 set according to the age of the oldest fossil  
485 pertaining to the clade (*Octodontotherium*, ca. 29  
486 Ma (Flynn, Swisher, 1995 in Kay et al., 1998) and  
487 is thus conservative (Fig. 1). But one can note that  
488 this age is roughly as old or older than the recent  
489 molecular estimations of the divergence time  
490 between the two genera of extant sloths (Slater et  
491 al. 2016; Delsuc et al. 2018). The age of  
492 divergence between *Lestodon* and *Glossotherium*  
493 was set according to the age of *Thinobadistes*  
494 (Hemphillian, ca. 9 Ma; Woodburne 2010), which is  
495 more closely related to *Lestodon* than  
496 *Glossotherium* according to Gaudin (2004). Extinct  
497 sloths were placed according to their known  
498 geological ages (see above; for Pleistocene taxa, a  
499 relatively young age of 0.1 Ma was arbitrarily  
500 given. Length of the branches leading to nodes of  
501 unknown ages, which are in direct relation to  
502 extinct taxa, and from these to terminal extinct  
503 taxa, were arbitrarily set at 1 and 0.1 Ma,  
504 respectively. Caution should be taken regarding  
505 the phylogenetic scheme used herein, because  
506 recent developments (yet to be published) in  
507 phylogenetic analyses of xenarthrans, which  
508 involve ancient DNA, might imply significant  
509 alterations of our understanding of sloths'  
510 systematics (R.D.E. MacPhee, pers. comm.,  
511 2018).

512

513 Institutional abbreviations

514 **MCL**, Museu de Ciências Naturais da Pontifícia  
515 Universidade Católica de Minas Gerais, Belo  
516 Horizonte, Brazil; **MNHN.F**, Muséum national  
517 d'Histoire naturelle, Paris, France, Palaeontology  
518 collection; **ZMB\_MAM**, Museum für Naturkunde  
519 Berlin (Germany), Mammals Collection; **ZSM**;  
520 Zoologische Staatssammlung München, Germany.

## 521 RESULTS

### 522 Qualitative observations of diaphyseal 523 structure

524 In the humerus of small armadillos and  
525 anteaters, the medullary cavity is mostly devoid of  
526 spongy bone (with just a few isolated trabeculae,  
527 e.g., *Chaetophractus vellerosus* ZSM-1926-24,  
528 Fig. 2A; *Cyclopes didactylus*, ZMB\_MAM\_3913). In  
529 larger members of these clades, the medullary  
530 cavity is filled throughout the proximodistal length  
531 of the diaphysis by a more or less dense  
532 spongiosa (e.g., *Priodontes maximus* ZSM-1931-  
533 293; *Myrmecophaga tridactyla*,  
534 ZMB\_MAM\_102642; Fig. 2B-C). In extant sloths, a  
535 spongiosa can be observed in most of the  
536 diaphysis (*Bradypus*; n=4) or throughout its length  
537 (*Choloepus*, Fig. 2E; n=4), but a central region free  
538 of trabeculae subsists. The medullary cavity of the  
539 whole diaphysis is full of spongy bone in  
540 *Glossotherium* (n=1; Fig. 2F). It is nearly full in  
541 *Scelidotherium*, with just a small central free region  
542 subsisting (n=1). For *Hapalops*, a clear  
543 assessment cannot be given due to the  
544 preservation of the specimens at hand  
545 (MNHN.F.SCZ162 seems to show a free medullary  
546 cavity, but MNHN.F.SCZ164, which only preserves  
547 the proximal third of bone, shows a medullary  
548 cavity full of spongy bone). The whole diaphysis of  
549 the larger sloths *Megatherium* and *Lestodon* were  
550 not observed, but it is noteworthy that their  
551 epiphyses are filled with dense spongiosa (each  
552 n=1).

553 The radius of extant xenarthrans shows the  
554 same pattern as the humerus. In *Glossotherium*,  
555 *Lestodon*, and *Megatherium*, the medullary cavity  
556 of the whole radial diaphysis is essentially full of  
557 spongy bone (Fig. 2G; no data for *Hapalops* for  
558 which the entire radial epiphysis could not have  
559 been sampled). While the hind limb was not  
560 sampled for this study, it is noteworthy that the  
561 observation of a 'naturally sectioned' tibia of the  
562 small-sized *Nothrotherium* (less than ca. 100 kg;  
563 Amson et al. 2016) reveals that the medullary  
564 cavity is entirely filled with dense spongy bone  
565 (Fig. 2D).

566

### 567 Univariate comparisons

568 The structure of the Mc III of extant species did  
569 not differ notably among the lifestyle categories  
570 (Fig. 3A-B; Table 2). There is only a tendency for  
571 the anteaters and armadillos to have a more  
572 compact mid-diaphysis (Fig. 3A). Mc III structure  
573 was therefore not further studied, and not included  
574 in the discriminant analyses (see below). One can  
575 note, however, that some armadillos have an  
576 outlyingly high CSS (i.e., very elliptic cross-section)



## PREPRINT

577 at mid-diaphysis (Fig. 3B; the single most elliptical  
578 value is found in the subterranean *Calyptophractus*  
579 *retusus* ZSM-1961-316). A great disparity of CSS  
580 at this location is found in extinct sloths, with the  
581 value of *Valgipes* falling among the outlying  
582 armadillos just mentioned, and that of  
583 *Megatherium* being the single lowest (i.e., most  
584 circular cross-section).

585 The humeral diaphysis in *Hapalops* is  
586 remarkably compact. At mid-diaphysis (n=1), it  
587 features the highest GC value of the whole dataset  
588 (Fig. 3C; Table 2). At 35% of the diaphyseal length  
589 (from the proximal end, level which was sampled  
590 to include fragmentary fossils, see Material and  
591 Methods; n=2), *Hapalops* falls in the uppermost  
592 distribution of the extant sloths, which does not  
593 markedly differ from that of armadillos or anteaters.  
594 The CSS at humeral mid-diaphysis distinguishes  
595 quite clearly the functional categories, with high  
596 values (i.e., elliptical cross-sections) in armadillos,  
597 intermediate values in anteaters, and low values  
598 (i.e., round cross-sections) in extant sloths. In  
599 *Hapalops*, this parameter falls among the  
600 particularly tight range of extant sloths (Fig. 3D),  
601 but among that of anteaters at 35% of the  
602 diaphyseal length. In *Scelidotherium* (n=1), the GC  
603 of the humerus at mid-diaphysis is higher than that  
604 of most extant xenarthrans, falling in the upper  
605 distribution of armadillos and extant sloths (Fig.  
606 3C). One should note, however, that this  
607 parameter does not yield any clear distinction  
608 among lifestyles. The humeral CSS at mid-  
609 diaphysis of *Scelidotherium*, on the other hand,  
610 falls among anteaters (Fig. 3D).

611 There is a clear tendency for the radial  
612 diaphysis GC to be highest in armadillos,  
613 intermediate in anteaters, and lowest in extant  
614 sloths. *Hapalops* (n=1; sampled at 72% of  
615 diaphyseal length) falls among the distribution of  
616 armadillos, being slightly higher than extant sloths'  
617 values (Table 2). The GC of *Glossotherium* and  
618 *Lestodon* at radial mid-diaphysis is very low, which  
619 agrees with the tendency observed in extant sloths  
620 (Fig. 3E). The CSS at that location is found as  
621 rather homogeneously low among extant  
622 xenarthrans, except for two armadillos with  
623 outlying high values. *Glossotherium* and *Lestodon*  
624 fall beyond the distribution of most extant  
625 xenarthrans, their CSS being only tied or exceeded  
626 by the two outlying armadillos (Fig. 3F).

627 Regarding the trabecular architecture  
628 parameters, only the degree of anisotropy (DA) will  
629 be presented with univariate comparisons, as it  
630 was singled out as the most functionally  
631 informative of these parameters in extant  
632 xenarthrans (Amson et al. 2017a). But mean  
633 values of other trabecular parameters of interest

634 are also presented in Table 3. For the humeral  
635 head, using a ROI representing 72% of the  
636 maximum volume (see Material ad Methods  
637 section), armadillos are distinguished from other  
638 extant xenarthrans by their high values (i.e. more  
639 anisotropic architecture). Both *Hapalops* and  
640 *Lestodon* (n=1 in each case) fall in the upper  
641 distribution (i.e., more anisotropic) of extant sloths  
642 and anteaters (Fig. 4A). The same pattern is found  
643 for the full ROI in *Lestodon* (no data for *Hapalops*,  
644 see Material ad Methods section). In the distal  
645 radius (trochlea), the trabecular architecture of  
646 armadillos is again found as more anisotropic than  
647 in the other extant categories. Moreover, the main  
648 distribution of extant sloths is found as clustering at  
649 the level of the lower values of anteaters. The DA  
650 value of *Hapalops* falls above the main distribution  
651 of extant sloths, within that of anteaters (Fig. 4B).  
652 *Glossotherium* is the sampled taxon with the single  
653 lowest DA value (most isotropic structure). One  
654 should note, however, that DA was significantly  
655 correlated to body size (see Discussion). The main  
656 direction of the trabeculae (MDT) in the radial  
657 trochlea (humeral head did not yield lifestyle  
658 discrimination; Amson et al. 2017b) of both  
659 *Hapalops* and *Glossotherium* falls outside the  
660 distribution of extant xenarthrans (Fig. 4C). In both  
661 cases, the MDT falls closer to the distribution of  
662 extant sloths.

663

### 664 **Phylogenetically flexible discriminant** 665 **analyses**

666 Each studied "ground sloth" was subject to an  
667 independent analysis (see Material and Methods),  
668 to predict the most probable lifestyle among the  
669 three broad lifestyle categories represented by  
670 armadillos, anteaters, and extant sloths,  
671 respectively. The results regarding classification of  
672 each "ground sloth" are given in Table 4, and the  
673 corresponding outcomes of the training data  
674 (posterior probability of the classification of the  
675 extant species according to each discriminant  
676 analysis) are given in SOM 4. We also provide the  
677 canonical coefficients (weights) of each  
678 explanatory variable for each analysis in SOM 5.  
679 For *Hapalops*, 18 parameters could be initially  
680 included in the analysis (diaphyseal and trabecular  
681 parameters, from both the humerus and radius).  
682 Due to high correlation among some variables  
683 (Conn.D between two ROIs; between Tb.Th and  
684 Tb.Sp of both ROIs; between BS and BV of the  
685 radial trochlea ROI), four variables were excluded.  
686 The recovered optimal Lambda is 0 (no significant  
687 correlation of the trait values with phylogeny) and  
688 the discrimination is optimal (training  
689 misclassification error of 0%). *Hapalops* is

## PREPRINT

690 classified in the category of extant sloths' lifestyle  
691 with a high posterior probability (>99%). Indeed, it  
692 falls close to extant sloths' distribution along the  
693 Discriminant Axis (pDA) 1 (Fig. 5A). However,  
694 *Hapalops* clearly falls beyond the distribution of  
695 extant xenarthrans along pDA2. The parameter  
696 contributing the most to the discrimination is the  
697 DA (that of the radial trochlea for pDA1 and that of  
698 the humeral head for pDA2; see SOM 5).

699 For *Lestodon*, eight parameters could be  
700 included (from the radial diaphysis and humeral  
701 head trabeculae), of which one was excluded  
702 because of collinearity (present between Tb.Th  
703 and Tb.Sp). The recovered optimal Lambda is  
704 0.84, and training misclassification error is 50%. It  
705 is classified in the armadillos' lifestyle category  
706 with a rather low posterior probability (64%), the  
707 second most probable classification being to  
708 anteaters (35%). According to this analysis, a  
709 classification in extant sloth's category is very  
710 improbable (0.006%). *Lestodon* falls beyond the  
711 distribution of extant xenarthrans (Fig. 5B). The  
712 parameter contributing the most to the  
713 discrimination is the 'size-normalized' Tb.Th (for  
714 both pDA1 and pDA2).

715 For *Glossotherium*, eight parameters could be  
716 included (from the radial diaphysis and trabeculae  
717 of the radial trochlea). The recovered optimal  
718 Lambda is 0.88, and training misclassification error  
719 is 35%. The most probable classification is to  
720 anteaters (50%), followed by the equally probable  
721 classifications to armadillos or extant sloths (each  
722 25%). *Glossotherium* falls within the distribution of  
723 extant xenarthrans, but outside the distribution of  
724 each lifestyle class, just outside that of anteaters  
725 (Fig. 5C). The parameters contributing the most to  
726 the discrimination are the DA (pDA1) and 'size-  
727 normalized' BS (pDA2).

728 For *Scelidotherium*, only two parameters could  
729 be included (from the humeral diaphysis). An  
730 optimal Lambda of 0.96 and a high training  
731 misclassification error of 69% were recovered. The  
732 three possible classifications are roughly equally  
733 probable (anteater: 37%; extant sloth: 36%;  
734 armadillo: 27%). *Scelidotherium* basically falls in  
735 the middle of the distribution of extant xenarthrans  
736 (Fig. 5D). The parameter contributing the most to  
737 the discrimination is CSS (for both pDA1 and  
738 pDA2).

739

## 740 DISCUSSION

741 On the whole, the classification of extinct sloths  
742 to one of the extant xenarthran lifestyles (that of

743 armadillos, anteaters, or extant sloths) based on  
744 forelimb bone structure proved to be challenging.  
745 This appears to be due to at least three obvious  
746 causes: (1) the imperfect lifestyle discrimination  
747 based on diaphyseal and trabecular parameters,  
748 (2) the difficulties raised by the size correction (for  
749 some parameters), and (3) the fact that the values  
750 of extinct taxa are outliers with respect to the  
751 distribution of extant xenarthrans (for some  
752 parameters).

753 The four discriminant analyses we performed  
754 vary greatly in the number of included parameters.  
755 As expected, analyses including more parameters  
756 yielded a better discrimination. The lowest  
757 misclassification error (0%) was obtained for the  
758 analysis of *Hapalops*, for which it was possible to  
759 include 14 parameters (18 before exclusion of  
760 collinear parameters) from both the diaphysis and  
761 epiphyseal trabeculae. The worst discrimination  
762 (69% of misclassification error) was found for the  
763 analysis of *Scelidotherium*, for which only two  
764 parameters, from the humeral diaphysis, could  
765 have been included. This lends support to the  
766 approach of combining parameters from several  
767 bone compartments, if one endeavours to  
768 discriminate lifestyles based on these parameters.

769 Several of the investigated parameters were  
770 significantly correlated with body size. To attempt  
771 to prevent the size of the studied taxa from  
772 influencing the analysis, a common approach is to  
773 size-correct the raw data using the residuals of a  
774 regression of the trait against a body size proxy  
775 (Mccoy et al. 2006). This proved to be challenging  
776 for extinct sloths, because, for most of them, body  
777 size largely exceeds that of extant xenarthrans  
778 (Vizcaíno et al. 2017). This potentially makes the  
779 size regressions spurious, as the extreme values  
780 over-influence the regression coefficients. This is  
781 not a trivial consideration for our dataset. For  
782 instance, if one would size-correct the DA in the  
783 radial trochlea using the residuals of the  
784 corresponding size regression, the medium-sized  
785 extinct sloth *Glossotherium*, of which the raw DA  
786 value was found as the lowest of the dataset,  
787 would fall in the middle of the overall distribution.  
788 For those parameters that are dimensionless, we  
789 hence decided to use the untransformed data. But  
790 this is likely to be biased as well. For instance, the  
791 scaling exponent of the degree of anisotropy (DA)  
792 across primates in the humeral and femoral head  
793 was found by Ryan & Shaw (2013) to be  
794 significantly negative (but close to 0, which would  
795 have denoted isometry). We also found a negative  
796 scaling exponent for one of the investigated ROI,  
797 the radial trochlea. It would be suboptimal to  
798 exclude this parameter, especially because it was  
799 found as the best functionally discriminating



PREPRINT

800 parameter in extant xenarthrans (Amson et al.  
801 2017a). It was also singled out as reflecting joint  
802 loading in primates better than other parameters  
803 (Tsegai et al. 2018), and, more generally, DA was  
804 found as functionally informative in several  
805 analyses about that clade (e.g. Ryan & Ketcham  
806 2002; Griffin et al. 2010; Barak et al. 2013; Su et  
807 al. 2013; Georgiou et al. 2018; Ryan et al. 2018;  
808 Tsegai et al. 2018). A tendency for a more  
809 anisotropic structure in the femoral head of  
810 arboreal squirrels was also demonstrated (Mielke  
811 et al. 2018b). A way to make the size-correction  
812 more accurate in our case would be to include  
813 xenarthrans to the sampling that have a body size  
814 between that of extant species and that of the giant  
815 “ground sloths”, i.e., with a mass roughly between  
816 50 kg and 300 kg. Unfortunately, the number of  
817 known xenarthrans of this size range is very  
818 limited.

819 It was already obvious from univariate  
820 comparisons that the bone structure in *Hapalops*,  
821 the small-sized extinct sloth, departed from the  
822 condition observed in extant xenarthrans. Indeed,  
823 the overall great compactness of its humeral  
824 diaphysis does not seem to be matched by any  
825 other sampled xenarthrans (but see aquatic  
826 specialization of *Thalassocnus*; Amson et al.  
827 2014). This does not seem to be a systemic bone  
828 mass increase (Amson et al. 2018), because  
829 neither the trabecular parameters nor the  
830 compactness of the radial diaphysis of this taxon  
831 seems to be notably affected by bone mass  
832 increase. Finding a compact humerus is  
833 particularly surprising, as the stylopod can be  
834 expected to be less compact in terrestrial  
835 mammals (Amson & Kolb 2016). In the case of  
836 *Lestodon*, it was not obvious from univariate  
837 comparisons that its bone structure was outlying,  
838 but both the latter and *Hapalops* fell outside the  
839 range of extant xenarthrans in the respective  
840 discriminant analyses. One may hence conclude  
841 that, based on their bone structure, the humerus  
842 and radius of both *Hapalops* and *Lestodon* were  
843 likely involved in a loading regime different from  
844 those associated with the lifestyles of extant  
845 xenarthrans. For *Hapalops*, one can however note  
846 that the phylogenetically informed discriminant  
847 analysis strongly supports a classification within  
848 extant sloths’ category, which might indicate that  
849 some aspects of their mechanical environment  
850 were similar. The main direction of the trabecular  
851 (MDT) also agrees with the fact that the bone  
852 structure of extant sloth is different but the most  
853 similar of the three extant lifestyles discriminated  
854 here (Fig. 4C). Based on bone gross morphology,  
855 *Hapalops* was previously reconstructed as partly or  
856 primarily arboreal (Matthew 1912; White 1997).  
857 Both bone structure and gross morphology

858 therefore seem to point in the same direction for  
859 the reconstruction of *Hapalops*’ lifestyle. The large-  
860 sized *Lestodon*, on the other hand, is not classified  
861 with strong support to one of the extant groups.  
862 The least probable classification is to extant sloths’  
863 lifestyle (0.03% of posterior probability), which  
864 might suggest that the bone structure of *Lestodon*  
865 resembles more that of anteaters and armadillos.  
866 Naturally, suspensory posture has never been  
867 purported for this elephant-sized sloth. *Lestodon*  
868 was interpreted as traviportal (slow-moving with  
869 both quadrupedal and bipedal stances) by Toledo  
870 (1996), and the forelimb gross morphology was  
871 found to be consistent with fossorial activity (but  
872 probably not to procure food (Coombs 1983); see  
873 Bargo et al. (2000) for a more tempered  
874 interpretation). Including other fossorial and non-  
875 fossorial taxa in the sampling of the bone structure  
876 analysis will be necessary to suggest a more  
877 precise assertion regarding the digging habits of  
878 this taxon (but its large size will be problematic,  
879 see above). The two other extinct sloths subject to  
880 a discriminant analysis, *Glossotherium* and  
881 *Scelidotherium*, differ from the former two in falling  
882 within the distribution of extant xenarthrans.  
883 However, in neither case is the classification clear,  
884 and it seems that acquiring additional bone  
885 structure parameters will be necessary to draw  
886 reliable conclusions.

887 The Mc III did not yield clear discrimination  
888 among the extant lifestyles and was hence not  
889 included in the discriminant analyses. But one can  
890 note that an interesting pattern was observed in  
891 the cross-sectional shape (CSS) of extinct sloths at  
892 mid-diaphysis. Indeed, high values, denoting  
893 elliptic sections, are found in *Valgipes* and  
894 *Glossotherium*. Such a bone structure is expected  
895 to be suited to resist bending along its major axis  
896 (Ruff & Hayes 1983). This is consistent with  
897 previous lifestyle reconstruction of *Glossotherium*,  
898 which is argued to have had fossorial habits  
899 (Coombs 1983; Bargo et al. 2000) supposedly  
900 entailing a well-marked main direction of bending.  
901 Furthermore, it might suggest that *Valgipes* had  
902 similar habits, which, to our knowledge, was never  
903 purported.

904 A medulla filled with spongy bone was  
905 observed in large-sized mammals, and argued to  
906 be a potential adaptation to graviportal  
907 (Houssaye et al. 2015). It does not seem to be  
908 possible to easily draw such a conclusion for  
909 xenarthrans: whatever their lifestyle, xenarthrans  
910 with a mass of roughly 5 kg (e.g., *Tamandua*) and  
911 over tend to fill their medullary cavity with spongy  
912 bone. This is true for the forelimb, as described  
913 here (and as also reported by Houssaye et al.  
914 (2015) for the humerus), but likely also for the hind

## PREPRINT

915 limb, as suggested by the tibia of the small-sized  
916 extinct sloth *Nothrotherium* described herein. In the  
917 case of xenarthrans, the great quantity of  
918 diaphyseal trabeculae might be related to another  
919 aspect affecting bone structure, such as mineral  
920 homeostasis and/or metabolism. While more  
921 experimental data is required to discuss it beyond  
922 speculation, it was reported that extant sloths (at  
923 least the two-toed sloth *Choloepus*) are prone to  
924 soft tissue mineralization likely due to mineral  
925 imbalance (Han & Garner 2016). One can  
926 therefore speculate that the observed great  
927 quantity of diaphyseal trabeculae might be a  
928 storage mechanism for mineral in excess.

929 The extremely low metabolism of extant sloths  
930 was suggested by Montañez-Rivera et al. (2018)  
931 as a potential explaining factor for their low cortical  
932 compactness (CC). Indeed, they found that extant  
933 sloths depart in that regard from other extant  
934 xenarthrans as well as from two extinct sloths (the  
935 small-sized *Hapalops* and *Parocnus*). No  
936 quantitative assessment of CC was performed  
937 here. But we can report that, at mid-diaphysis, the  
938 CC of the sampled extinct sloths was generally  
939 observed as low (when an observation was  
940 possible), similar to armadillos and anteaters.  
941 Nevertheless, two specimens showed a rather  
942 porous cortex, *Hapalops* (humerus;  
943 MNHN.F.SCZ162) and *Glossotherium* (radius;  
944 MNHN.F.PAM756), though not as porous as that  
945 of most extant sloths. A dedicated analysis of  
946 extinct sloths' CC is required to investigate this trait  
947 and possibly use it to inform metabolic rate  
948 reconstruction in extinct sloths.

949 Comparison of long bone's cross-sections  
950 among specimens should be performed at the  
951 same location, usually defined as a percentage of  
952 the bone's length (e.g., Ruff & Hayes 1983). Here,  
953 mid-diaphysis (i.e., 50% of bone length) was  
954 selected for complete bones, and, for fragmentary  
955 specimens (some fossils), it is the preserved level  
956 closest to mid-diaphysis that was used (the other  
957 specimens were resampled accordingly). Because  
958 of the xenarthran bones' morphology, most  
959 examined cross-sections were located at the level  
960 of a prominent bony process. One could therefore  
961 consider selecting cross-sections avoiding those  
962 processes to test their influence on bone structural  
963 parameters. Acquiring cross-sectional properties  
964 along the whole diaphysis and assessing the  
965 proximodistal evolution of biomechanical  
966 properties can also be considered for complete  
967 bones (Houssaye & Botton-Divet 2018).

968 In addition to the lifestyle of an individual, one  
969 can expect for its bone structure to be affected by  
970 age, health status, and possibly other factors

971 varying intraspecifically (such as sex differences;  
972 Eckstein et al. 2007). Details regarding these  
973 potential factors are mostly unknown for fossils. To  
974 control for these factors as much as feasible, the  
975 sampled specimens were chosen to be devoid of  
976 apparent bone diseases and skeletally mature  
977 (even though several presented a remnant of  
978 epiphyseal line, see above). It is our assumption  
979 that variations in bone structure that relate to a  
980 different lifestyle can be expected to be of greater  
981 magnitude than intraspecific variations. But this  
982 chiefly remains to be demonstrated.

## 983 CONCLUSION

984 Bone structure of the diaphysis and epiphyses  
985 of the third metacarpal, humerus, and radius was  
986 here investigated in several species of extinct  
987 sloths, comparing it to that of extant xenarthrans.  
988 Related parameters were successfully acquired  
989 and included in phylogenetically flexible  
990 discriminant analyses. The latter constitute, to our  
991 knowledge, the first analyses that conjointly  
992 include both diaphyseal and trabeculae  
993 parameters to discriminate lifestyles. However, no  
994 extinct sloths are here confidently ascribed to one  
995 of the lifestyles exhibited by extant xenarthrans.  
996 This might be due to several factors, and we  
997 identified as challenges for the present analysis  
998 the lack of discrimination power of some  
999 parameters, the difficulties raised by size-  
1000 correlated parameters, and the fact that some  
1001 parameters fall outside the range described by  
1002 extant taxa. The humeral and radial structure of  
1003 the small-sized *Hapalops*, from the Miocene of  
1004 Argentina, was nevertheless found as more  
1005 reminiscent of that of extant sloths, which agrees  
1006 with the conclusions drawn based on gross  
1007 morphology. The humeral and radial structure of  
1008 the large-sized *Lestodon*, from the Pleistocene of  
1009 Argentina, clearly departs from that of extant  
1010 sloths, and is more similar to that of anteaters and  
1011 armadillos. The singular bone structure of  
1012 xenarthrans, including a medullary cavity filled with  
1013 spongy bone in most taxa, and a low cortical  
1014 compactness in extant sloths, deserves further  
1015 investigation. Because Xenarthra is argued to be  
1016 one of the four early diverging clades of placental  
1017 mammals (Delsuc & Douzery 2008; Asher et al.  
1018 2009; Gaudin & Croft 2015), such investigations  
1019 are not only important for the understanding of the  
1020 evolutionary history of the clade, but potentially for  
1021 that of Mammalia as well.

## 1022 ACKNOWLEDGEMENTS

## PREPRINT

1023 We warmly thank the following curators and 1073  
1024 collection managers: Guillaume Billet (Muséum 1074  
1025 national d'Histoire naturelle, Paris; MNHN), Cástor 1075  
1026 Cartelle (Museu de Ciencias Naturais da Pontifícia 1076  
1027 Universidade Católica de Minas Gerais, Belo 1077  
1028 Horizonte, Brazil), Anneke H. van Heteren 1078  
1029 (Zoologische Staatssammlung München), Frieder 1079  
1030 Mayer and Christiane Funk (Museum für 1080  
1031 Naturkunde Berlin), Thomas Kaiser and Nelson 1081  
1032 Ribeiro Mascarenhas (Universität Hamburg), Irina 1082  
1033 Ruf and Katrin Krohmann (Senckenberg 1083  
1034 Forschungsinstitut und Naturmuseum), Stefan 1084  
1035 Merker (Staatlichen Museums für Naturkunde 1085  
1036 Stuttgart), Eva Bärmann (Zoologische 1086  
1037 Forschungsmuseum Alexander Koenig). Anneke 1087  
1038 H. van Heteren (Zoologische Staatssammlung 1088  
1039 München), Patrick Arnold (Friedrich-Schiller- 1089  
1040 Universität Jena), and Aurore Canoville (NC State 1090  
1041 University) are acknowledged for helping with 1091  
1042 acquisition of the extant species scans. We thank 1092  
1043 Patricia Wills, Marta Bellato, and Maité Adam 1093  
1044 (AST-RX platform, MNHN) for acquiring the extinct 1094  
1045 species scans. We acknowledge Luis D. Verde 1095  
1046 Arregoitia for his help with the function pFDA. 1096  
1047 Andrew Pitsillides (acting as a reviewer), an 1097  
1048 anonymous reviewer, Alexandra Houssaye (acting 1098  
1049 as a PCI recommender) and an additional PCI 1099  
1050 recommender are thanked for the improvement 1100  
1051 they brought to the manuscript. 1101

## 1052 ADDITIONAL INFORMATION

### 1053 Funding

1054 This research received support from the 1100  
1055 SYNTHESYS Project 1101  
1056 <http://www.SYNTHESYS.info/> which is financed by 1102  
1057 European Community Research Infrastructure 1103  
1058 Action under the FP7 Integrating Activities 1104  
1059 Programme. EA was funded by the Alexander von 1105  
1060 Humboldt Foundation. JAN and EA were funded 1106  
1061 by the German Research Council (DFG EXC 1027 1107  
1062 and DFG AM 517/1-1, respectively). 1108

### 1063 Competing interests

1064 The authors declare they have no personal or 1110  
1065 financial conflict of interest relating to the content 1111  
1066 of this preprint. 1112

### 1067 Author contributions

1068 Conceptualization and methodology, EA, JAN; 1113  
1069 Formal analysis, EA; Investigation, EA; Writing – 1114  
1070 Original draft, EA; Writing – Review & editing, EA, 1115  
1071 JAN. All authors gave final approval for publication. 1116  
1117

### 1072 Data availability

1073 All the raw scans of fossil specimens sampled 1074  
1075 for the present analysis will be available from the 1076  
1077 MNHN collection database pending an embargo. 1078  
1079 The extant species specimens sampled come from 1080  
1081 various collections. The corresponding raw scans 1082  
1083 are available upon reasonable request to the 1084  
1085 authors. 1086

## 1087 Supplementary information

1088 SOM 1. Raw data. Excel document, of which 1089  
1090 each worksheet corresponds to a sampled region. 1091

1092 SOM 2. ImageJ macro to crop isometrically a 1093  
1094 stack in 3D. 1095

1096 SOM 3. ImageJ macro to acquire mid-diaphyseal 1097  
1098 parameters. 1099

1100 SOM 4. Lifestyle classification of the extant taxa, 1101  
1102 the training data of the phylogenetically flexible 1103  
1104 discriminant analyses (one analysis was performed 1105  
1106 per extinct taxon, each on a different worksheet). 1107

1108 SOM 5. Canonical coefficients for each 1109  
1110 phylogenetically flexible discriminant analysis (one 1111  
1112 analysis was performed per extinct taxon, each on 1113  
1114 a different worksheet). 1115

## 1095 REFERENCES

- 1096 Abba, A. M., and M. Superina. 2016. *Dasyopus* 1097  
1098 *hybridus* (Cingulata: Dasypodidae). 1099  
1100 Mammalian Species 48:10–20. 1101
- 1102 Amson, E., C. Argot, H. G. McDonald, and C. de 1103  
1104 Muizon. 2015. Osteology and functional 1105  
1106 morphology of the axial postcranium of the 1107  
1108 marine sloth *Thalassocnus* (Mammalia, 1109  
1110 Tardigrada) with paleobiological implications. 1111  
1112 Journal of Mammalian Evolution 22:473–518. 1113
- 1114 Amson, E., P. Arnold, A. H. van Heteren, A. 1115  
1116 Canoville, and J. A. Nyakatura. 2017a. 1117  
1118 Trabecular architecture in the forelimb 1119  
1120 epiphyses of extant xenarthrans (Mammalia). 1121  
1122 Frontiers in Zoology 14:52. 1123
- 1124 Amson, E., G. Billet, and C. de Muizon. 2018. 1125  
1126 Evolutionary adaptation to aquatic lifestyle in 1127  
1128 extinct sloths can lead to systemic alteration 1129  
1130 of bone structure. Proceedings of the Royal 1131  
1132 Society B 285:20180270. 1133
- 1134 Amson, E., J. D. Carrillo, and C. Jaramillo. 2016. 1135  
1136 Neogene sloth assemblages (Mammalia, 1137  
1138 Pilosa) of the Cocinetas Basin (La Guajira, 1139  
1140 Colombia): implications for the Great 1141  
1142 American Biotic Interchange. Palaeontology 1143  
1144 59. 1145



PREPRINT

- 1121 Amson, E., and C. Kolb. 2016. Scaling effect on 1171 610.  
 1122 the mid-diaphysis properties of long bones—  
 1123 the case of the Cervidae (deer). *The Science* 1172  
 1124 of Nature 103:58. 1173  
 1174
- 1125 Amson, E., C. de Muizon, and T. J. Gaudin. 2017b. 1175  
 1126 A reappraisal of the phylogeny of the 1176  
 1127 Megatheria (Mammalia: Tardigrada), with an  
 1128 emphasis on the relationships of the 1177  
 1129 Thalassocninae, the marine sloths. 1178  
 1130 *Zoological Journal of the Linnean Society* 1179  
 1131 179:217–236. 1180  
 1181
- 1132 Amson, E., C. de Muizon, M. Laurin, C. Argot, and  
 1133 V. de Buffrénil. 2014. Gradual adaptation of 1182  
 1134 bone structure to aquatic lifestyle in extinct 1183  
 1135 sloths from Peru. *Proceedings of the Royal* 1184  
 1136 *Society B: Biological Sciences*  
 1137 281:20140192. 1185  
 1186
- 1138 Amson, E., and J. A. Nyakatura. 2017. The 1187  
 1139 postcranial musculoskeletal system of 1188  
 1140 Xenarthrans: Insights from over two centuries  
 1141 of research and future directions. *Journal of* 1189  
 1142 *Mammalian Evolution*, doi: 10.1007/s10914- 1190  
 1143 017-9408-7. 1191  
 1192
- 1144 Asher, R. J., N. Bennett, and T. Lehmann. 2009. 1193  
 1145 The new framework for understanding  
 1146 placental mammal evolution. *BioEssays* 1194  
 1147 31:853–864. 1195  
 1196
- 1148 Barak, M. M., D. E. Lieberman, and J.-J. Hublin. 1197  
 1149 2011. A Wolff in sheep's clothing: Trabecular 1198  
 1150 bone adaptation in response to changes in 1199  
 1151 joint loading orientation. *Bone* 49:1141–1151. 1200
- 1152 Barak, M. M., D. E. Lieberman, D. Raichlen, H. 1201  
 1153 Pontzer, A. G. Warrener, and J. J. Hublin. 1202  
 1154 2013. Trabecular evidence for a human-like 1203  
 1155 gait in *Australopithecus africanus*. *PLoS ONE* 1204  
 1156 8. 1205  
 1206
- 1157 Bargo, M. S., N. Toledo, and S. F. Vizcaíno. 2012. 1207  
 1158 Paleobiology of the Santacrucian sloths and  
 1159 anteaters (Xenarthra, Pilosa). Pp. 216–242 in 1208  
 1160 S. F. Vizcaíno, R. F. Kay, and M. S. Bargo,  
 1161 eds. *Early Miocene Paleobiology in* 1210  
 1162 *Patagonia: High-Latitude Paleocommunities* 1211  
 1163 *of the Santa Cruz Formation*. Cambridge 1212  
 1164 University Press, Cambridge. 1213
- 1165 Bargo, M. S., S. F. Vizcaíno, F. M. Archuby, and R. 1214  
 1166 E. Blanco. 2000. Limb bone proportions, 1215  
 1167 strength and digging in some Lujanian (late 1216  
 1168 Pleistocene-early Holocene) mylodontid 1217  
 1169 ground sloths (Mammalia, Xenarthra). 1218  
 1170 *Journal of Vertebrate Paleontology* 20:601–
- Biewener, A. A., N. L. Fazzalari, D. D. Konecynski, and R. V. Baudinette. 1996. Adaptive changes in trabecular architecture in relation to functional strain patterns and disuse. *Bone* 19:1–8.
- Cartelle, C., G. De Iuliis, and R. L. Ferreira. 2009. Systematic revision of tropical Brazilian scelidotheriine sloths (Xenarthra, Mylodontoidea). *Journal of Vertebrate Paleontology* 29:555–566.
- Carter, D. R., and G. S. Beaupré. 2001. *Skeletal Function and form*. Cambridge University Press, Cambridge.
- Coombs, M. C. 1983. Large mammalian clawed herbivores: a comparative study. *Transactions of the American Philosophical Society, New series* 73:1–96.
- Coutier, F., L. Hautier, R. Cornette, E. Amson, and G. Billet. 2017. Orientation of the lateral semicircular canal in Xenarthra and its links with head posture and phylogeny. *Journal of Morphology* 278.
- Delsuc, F., and E. J. P. Douzery. 2008. Recent advances and future prospects in xenarthran molecular phylogenetics. Pp. 11–23 in S. F. Vizcaino and W. J. Loughry, eds. *The Biology of the Xenarthra*. University Press of Florida, Gainesville.
- Delsuc, F., M. Kuch, G. C. Gibb, J. Hughes, P. Szpak, J. Southon, J. Enk, A. T. Duggan, and H. N. Poinar. 2018. Resolving the phylogenetic position of Darwin's extinct ground sloth (*Myodon darwini*) using mitogenomic and nuclear exon data. *Proceedings of the Royal Society B* 285:20180214.
- DeSilva, J. M., and M. J. Devlin. 2012. A comparative study of the trabecular bony architecture of the talus in humans, non-human primates, and *Australopithecus*. *Journal of Human Evolution* 63:536–551.
- Doube, M., M. M. Kłosowski, I. Arganda-Carreras, F. P. Cordelières, R. P. Dougherty, J. S. Jackson, B. Schmid, J. R. Hutchinson, and S. J. Shefelbine. 2010. BoneJ: Free and extensible bone image analysis in ImageJ. *Bone* 47:1076–1079.

PREPRINT

- 1219 Eckstein, F., M. Matsuura, V. Kuhn, M. Priemel, R. 1267 the internal trabecular system. *Annals of*  
1220 Müller, T. M. Link, and E. M. Lochmüller. 1268 *Anatomy* 192:168–177.  
1221 2007. Sex differences of human trabecular  
1222 bone microstructure in aging are site- 1269  
1223 dependent. *Journal of Bone and Mineral* 1270  
1224 *Research* 22:817–824. 1271
- 1225 Fariña, R. A., and R. E. Blanco. 1996. 1272  
1226 *Megatherium*, the stabber. *Proceedings of* 1273  
1227 *the Royal Society B* 263:1725–1729. 1274
- 1228 Fariña, R. A., S. F. Vizcaíno, and M. S. Bargo. 1275  
1229 1998. Body mass estimations in Lujanian 1276  
1230 (late Pleistocene-early Holocene of South 1277  
1231 America) mammal megafauna. 1278  
1232 *Mastozoología Neotropical* 5:87–108. 1279
- 1233 Gaudin, T. J. 2004. Phylogenetic relationships 1280  
1234 among sloths (Mammalia, Xenarthra, 1281  
1235 Tardigrada): the craniodental evidence. 1282  
1236 *Zoological Journal of the Linnean Society* 1283  
1237 140:255–305. 1284
- 1238 Gaudin, T. J., and D. A. Croft. 2015. Paleogene 1285  
1239 Xenarthra and the evolution of South 1286  
1240 American mammals. *Journal of Mammalogy* 1287  
1241 96:622–634. 1288  
1289
- 1242 Georgiou, L., T. L. Kivell, D. H. Pahr, and M. M. 1290  
1243 Skinner. 2018. Trabecular bone patterning in 1291  
1244 the hominoid distal femur. *PeerJ* 6:e5156. 1292
- 1245 Germain, D., and M. Laurin. 2005. Microanatomy 1293  
1246 of the radius and lifestyle in amniotes 1294  
1247 (Vertebrata, Tetrapoda). *Zoologica Scripta* 1295  
1248 34:335–350. 1296
- 1249 Gibb, G. C., F. L. Condamine, M. Kuch, J. Enk, N. 1297  
1250 Moraes-Barros, M. Superina, H. N. Poinar, 1298  
1251 and F. Delsuc. 2016. Shotgun mitogenomics 1299  
1252 provides a reference phylogenetic framework 1300  
1253 and timescale for living xenarthrans. 1301  
1254 *Molecular Biology and Evolution* 33:621–642. 1302
- 1255 Griffin, N. L., K. D’Août, T. M. Ryan, B. G. 1303  
1256 Richmond, R. A. Ketcham, and A. Postnov. 1304  
1257 2010. Comparative forefoot trabecular bone 1305  
1258 architecture in extant hominids. *Journal of* 1306  
1259 *human evolution* 59:202–13. 1307  
1308
- 1260 Gross, T., T. L. Kivell, M. M. Skinner, N. H. 1309  
1261 Nguyen, and D. H. Pahr. 2014. A CT-image- 1310  
1262 based framework for the holistic analysis of 1311  
1263 cortical and trabecular bone morphology. 1312  
1264 *Palaeontologia Electronica* 17:1–13. 1313
- 1265 Hammer, A. 2010. The structure of the femoral 1314  
1266 neck: A physical dissection with emphasis on 1315
- Han, S., and M. M. Garner. 2016. Soft tissue mineralization in captive 2-toed sloths. *Veterinary Pathology* 53:659–665.
- Hayssen, V. 2010. *Bradypus variegatus* (Pilosa: Bradypodidae). *Mammalian Species* 42:19–32.
- Houssaye, A., and L. Botton-Divet. 2018. From land to water: evolutionary changes in long bone microanatomy of otters (Mammalia: Mustelidae). *Biological Journal of the Linnean Society*, doi: 10.1093/biolinnean/bly118.
- Houssaye, A., K. Waskow, S. Hayashi, A. H. Lee, and J. R. Hutchinson. 2015. Biomechanical evolution of solid bones in large animals: a microanatomical investigation. *Biological Journal of the Linnean Society* 117:350–371.
- Huynh Nguyen, N., D. H. Pahr, T. Gross, M. M. Skinner, and T. L. Kivell. 2014. Micro-finite element ( $\mu$ FE) modeling of the siamang (*Symphalangus syndactylus*) third proximal phalanx: The functional role of curvature and the flexor sheath ridge. *Journal of Human Evolution* 67:60–75.
- Kivell, T. L. 2016. A review of trabecular bone functional adaptation: what have we learned from trabecular analyses in extant hominoids and what can we apply to fossils? *Journal of Anatomy* 228:569–594.
- Kivell, T. L., M. M. Skinner, R. Lazenby, and J.-J. Hublin. 2011. Methodological considerations for analyzing trabecular architecture: an example from the primate hand. *Journal of anatomy* 218:209–25.
- Kolb, C., T. M. Scheyer, K. Veitschegger, A. M. Forasiepi, E. Amson, A. A. E. Van der Geer, L. W. Van den Hoek Ostende, S. Hayashi, and M. R. Sánchez-Villagra. 2015. Mammalian bone palaeohistology: A survey and new data with emphasis on island forms. *PeerJ* 2015.
- Lazenby, R. A., D. M. L. Cooper, S. Angus, and B. Hallgrímsson. 2008. Articular constraint, handedness, and directional asymmetry in the human second metacarpal. *Journal of Human Evolution* 54:875–885.
- Matthew, W. D. 1912. The ancestry of edentates:

PREPRINT

- 1315 as illustrated by the skeleton of *Hapalops*, a 1362  
 1316 tertiary ancestor of the ground sloths. 1363  
 1317 American Museum Journal 12:300–303. 1364
- 1318 Mccoy, M. W., B. M. Bolker, C. W. Osenberg, B. G. 1365  
 1319 Miner, and J. R. Vonesh. 2006. Size 1366  
 1320 correction: Comparing morphological traits 1367  
 1321 among populations and environments. 1368  
 1322 *Oecologia* 148:547–554. 1369
- 1323 Meier, P. S., C. Bickelmann, T. M. Scheyer, D. 1371  
 1324 Koyabu, and M. R. Sánchez-Villagra. 2013. 1372  
 1325 Evolution of bone compactness in extant and 1373  
 1326 extinct moles (Talpidae): exploring humeral 1374  
 1327 microstructure in small fossorial mammals. 1375  
 1328 *BMC evolutionary biology* 13:55. 1376
- 1329 Mielke, F., E. Amson, and J. A. Nyakatura. 2018a. 1377  
 1330 Morpho-functional analysis using procrustes 1378  
 1331 superimposition by static reference. 1379  
 1332 *Evolutionary Biology*, doi: 10.1007/s11692- 1380  
 1333 018-9456-9. 1381
- 1334 Mielke, M., J. Wölfer, A. H. van Heteren, E. 1382  
 1335 Amson, and J. A. Nyakatura. 2018b. 1383  
 1336 Trabecular architecture in the sciuromorph 1384  
 1337 femoral head: allometry and functional 1385  
 1338 adaptation. *Zoological Letters* 4:10. 1386
- 1339 Montañez-Rivera, I., J. A. Nyakatura, and E. 1387  
 1340 Amson. 2018. Bone cortical compactness in 1388  
 1341 “tree sloths” reflects convergent evolution. 1389  
 1342 *Journal of Anatomy*, doi: 10.1111/joa.12873. 1390
- 1343 Motani, R., and L. Schmitz. 2011. Phylogenetic 1391  
 1344 versus functional signals in the evolution of 1392  
 1345 form–function relationships in terrestrial 1393  
 1346 vision. *Evolution* 65:2245–2257. 1394
- 1347 Nyakatura, J. A. 2012. The convergent evolution of 1395  
 1348 suspensory posture and locomotion in tree 1396  
 1349 sloths. *Journal of Mammalian Evolution* 1397  
 1350 19:225–234. 1398
- 1351 Owen, R. 1861. Memoir on the *Megatherium*, or 1400  
 1352 giant ground-sloth of America (*Megatherium* 1401  
 1353 *americanum*, Cuvier). Williams and Norgate, 1402  
 1354 London. 1403
- 1355 Owen, R. 1839. Part I. Fossil Mammalia. Pp. 1– 1404  
 1356 111 in C. Darwin, ed. *The Zoology of the* 1405  
 1357 *Voyage of HMS Beagle*. Smith Elder and Co, 1406  
 1358 London. 1407
- 1359 Pagel, M. 1999. Inferring the historical patterns of 1408  
 1360 biological evolution. *Nature* 401:877–884. 1409
- 1361 Patiño, S. J., and R. A. Fariña. 2017. Ungual 1410
- phalanges analysis in Pleistocene ground sloths (Xenarthra, Folivora). *Historical Biology* 29:1065–1075.
- Perkins, M. E., J. G. Fleagle, M. T. Heizler, B. Nash, T. M. Bown, A. A. Tauber, and M. T. Dozo. 2012. Tephrochronology of the Miocene Santa Cruz and Pinturas Formations, Argentina. Pp. 23–40 in S. F. Vizcaíno, R. F. Kay, and M. S. Bargo, eds. *Early Miocene Paleobiology in Patagonia: high-latitude paleocommunities of the Santa Cruz Formation*. Cambridge University Press, Cambridge.
- Pontzer, H., D. E. Lieberman, E. Momin, M. J. Devlin, J. D. Polk, B. Hallgrímsson, and D. M. L. Cooper. 2006. Trabecular bone in the bird knee responds with high sensitivity to changes in load orientation. *The Journal of Experimental Biology* 209:57–65.
- Pujos, F., T. J. Gaudin, G. De Iuliis, and C. Cartelle. 2012. Recent advances on variability, morpho-functional adaptations, dental terminology, and evolution of sloths. *Journal of Mammalian Evolution* 19:159–169.
- Ruff, C. B., and W. C. Hayes. 1983. Cross-sectional geometry of Pecos Pueblo femora and tibiae - a biomechanical investigation: I. Method and general patterns of variation. *American Journal of Physical Anthropology* 60:359–81.
- Ruff, C. B., B. Holt, and E. Trinkaus. 2006. Who's afraid of the big bad Wolff?: “Wolff's law” and bone functional adaptation. *American Journal of Physical Anthropology* 129:484–498.
- Ryan, T. M., K. J. Carlson, A. D. Gordon, N. Jablonski, C. N. Shaw, and J. T. Stock. 2018. Human-like hip joint loading in *Australopithecus africanus* and *Paranthropus robustus*. *Journal of Human Evolution* 121:12–24.
- Ryan, T. M., and R. A. Ketcham. 2002. The three-dimensional structure of trabecular bone in the femoral head of strepsirrhine primates. *Journal of Human Evolution* 43:1–26.
- Ryan, T. M., and C. N. Shaw. 2013. Trabecular bone microstructure scales allometrically in the primate humerus and femur. *Proceedings of the Royal Society B* 280:20130172.
- Schindelin, J., I. Arganda-Carreras, E. Frise, V.



PREPRINT

- 1411 Kaynig, M. Longair, T. Pietzsch, S. Preibisch, 1460  
1412 C. Rueden, S. Saalfeld, B. Schmid, J.-Y. 1461  
1413 Tinevez, D. J. White, V. Hartenstein, K. 1462  
1414 Eliceiri, P. Tomancak, and A. Cardona. 2012. 1463  
1415 Fiji: an open-source platform for biological-  
1416 image analysis. *Nature Methods* 9:676–682. 1464  
1417 Schindelin, J., C. T. Rueden, M. C. Hiner, and K. 1466  
1418 W. Eliceiri. 2015. The ImageJ ecosystem: An 1467  
1419 open platform for biomedical image analysis. 1468  
1420 *Molecular Reproduction and Development*  
1421 82:518–529. 1469  
1422 Schneider, C. A., W. S. Rasband, and K. W. 1471  
1423 Eliceiri. 2012. NIH Image to ImageJ: 25 years 1472  
1424 of image analysis. *Nature Methods* 9:671–  
1425 675. 1473  
1426 Shaw, C. N., and T. M. Ryan. 2012. Does skeletal 1475  
1427 anatomy reflect adaptation to locomotor 1476  
1428 patterns? Cortical and trabecular architecture 1477  
1429 in human and nonhuman anthropoids.  
1430 *American journal of physical anthropology* 1478  
1431 147:187–200. 1479  
1432 Skinner, M. M., N. B. Stephens, Z. J. Tsegai, A. C. 1481  
1433 Foote, N. H. Nguyen, T. Gross, D. H. Pahr, J. 1482  
1434 Hublin, and T. L. Kivell. 2015. Human-like 1483  
1435 hand use in *Australopithecus africanus*. 1484  
1436 *Science* 347:395–399. 1485  
1437 Slater, G. J., P. Cui, A. M. Forasiepi, D. Lenz, K. 1486  
1438 Tsangaras, B. Voirin, N. de Moraes-Barros, 1487  
1439 R. D. E. MacPhee, and A. D. Greenwood. 1488  
1440 2016. Evolutionary relationships among 1489  
1441 extinct and extant sloths: The evidence of  
1442 mitogenomes and retroviruses. *Genome* 1490  
1443 *Biology and Evolution* 8:607–621. 1491  
1444 Smith, F. A., S. K. Lyons, S. K. M. Ernest, K. E. 1492  
1445 Jones, D. M. Kaufman, T. Dayan, P. A. 1493  
1446 Marquet, J. H. Brown, and J. P. Haskell. 1494  
1447 2003. Body Mass of Late Quaternary 1495  
1448 Mammals. *Ecology* 84:3403. 1496  
1449 Smith, P., and R. D. Owen. 2017. *Calyptophractus*  
1450 *retusus* (Cingulata: Dasypodidae). 1498  
1451 *Mammalian Species* 49:57–62. 1499  
1452 Sode, M., A. J. Burghardt, R. A. Nissenson, and S. 1501  
1453 Majumdar. 2008. Resolution dependence of 1502  
1454 the non-metric trabecular structure indices. 1503  
1455 *Bone* 42:728–736. 1504  
1456 Stephens, N. B., T. L. Kivell, T. Gross, D. H. Pahr, 1505  
1457 R. A. Lazenby, J.-J. Hublin, I. Hershkovitz, 1506  
1458 and M. M. Skinner. 2016. Trabecular 1507  
1459 architecture in the thumb of *Pan* and *Homo*: 1508  
implications for investigating hand use,  
loading, and hand preference in the fossil  
record. *American Journal of Physical  
Anthropology* 161:603–619.  
Straehl, F. R., T. M. Scheyer, A. M. Forasiepi, R.  
D. E. MacPhee, and M. R. Sánchez-Villagra.  
2013. Evolutionary patterns of bone histology  
and bone compactness in xenarthran  
mammal long bones. *PLoS ONE* 8:e69275.  
Su, A., and K. J. Carlson. 2017. Comparative  
analysis of trabecular bone structure and  
orientation in South African hominin tali.  
*Journal of Human Evolution* 106:1–18.  
Su, A., I. J. Wallace, and M. Nakatsukasa. 2013.  
Trabecular bone anisotropy and orientation in  
an Early Pleistocene hominin talus from East  
Turkana, Kenya. *Journal of Human Evolution*  
64:667–677.  
Tacutu, R., C. T. Craig, A. Budovsky, D. Wuttke,  
G. Lehmann, D. Taranukha, J. Costa, V. E.  
Fraiefeld, and J. De Magalhães. 2013. Human  
Ageing Genomic Resources: Integrated  
databases and tools for the biology and  
genetics of ageing. *Nucleic Acids Research*  
41:D1027–D1033.  
Toledo, N., M. S. Bargo, and S. F. Vizcaíno. 2013.  
Muscular reconstruction and functional  
morphology of the forelimb of early Miocene  
sloths (*Xenarthra*, *Folivora*) of Patagonia.  
*Anatomical record* 296:305–325.  
Toledo, P. M. 1996. Locomotor Patterns within the  
Pleistocene Sloths. PhD Thesis, University of  
Colorado.  
Tsegai, Z. J., T. L. Kivell, T. Gross, N. Huynh  
Nguyen, D. H. Pahr, J. B. Smaers, and M. M.  
Skinner. 2013. Trabecular bone structure  
correlates with hand posture and use in  
hominoids. *PLoS ONE* 8.  
Tsegai, Z. J., M. M. Skinner, A. H. Gee, D. H.  
Pahr, G. M. Treece, J.-J. Hublin, and T. L.  
Kivell. 2017. Trabecular and cortical bone  
structure of the talus and distal tibia in *Pan*  
and *Homo*. *American Journal of Physical  
Anthropology* 163:784–805.  
Tsegai, Z. J., M. M. Skinner, D. H. Pahr, J.-J.  
Hublin, and T. L. Kivell. 2018. Systemic  
patterns of trabecular bone across the human  
and chimpanzee skeleton. *Journal of  
Anatomy* 232:641–656.

PREPRINT

- 1509 Vizcaíno, S. F., M. S. Bargo, and G. H. Cassini. 1522 Evolution, doi: 10.1007/s10914-017-9400-2.  
1510 2006. Dental occlusal surface area in relation  
1511 to body mass, food habits and other 1523 White, J. L. 1997. Locomotor Adaptations in  
1512 biological features in fossil xenarthrans. 1524 Miocene Xenarthrans. Pp. 246–264 in R. F.  
1513 *Ameghiniana* 43:11–26. 1525 Kay, R. H. Madden, R. L. Cifelli, and J. J.  
1526 Flynn, eds. Vertebrate paleontology in the  
1514 Vizcaíno, S. F., R. A. Fariña, and G. V. Mazzetta. 1527 neotropics. The Miocene fauna of La Venta,  
1515 1999. Ulnar dimensions and fossoriality in 1528 Colombia. Smithsonian Institution Press,  
1516 armadillos. *Acta Theriologica* 44:309–320. 1529 Washington.
- 1517 Vizcaíno, S. F., N. Toledo, and M. S. Bargo. 2017. 1530 Woodburne, M. O. 2010. The Great American  
1518 Advantages and limitations in the use of 1531 Biotic Interchange: dispersals, tectonics,  
1519 extant xenarthrans (Mammalia) as 1532 climate, sea level and holding pens. *Journal*  
1520 morphological models for paleobiological 1533 of Mammalian Evolution 17:245–264.  
1521 reconstruction. *Journal of Mammalian*

PREPRINT

Table 1. List of fossils with type of data acquired for each bone.

| Species                            | Specimen number | Data type             |               |        |
|------------------------------------|-----------------|-----------------------|---------------|--------|
|                                    |                 | Humerus               | Radius        | Mc III |
| <i>Hapalops</i> sp.                | MNHN.F.SCZ166   | -                     | 72%MD; 100%TA | -      |
| <i>Hapalops</i> sp.                | MNHN.F.SCZ164   | 35%MD; 72%TA; (39%TA) | -             | -      |
| <i>Hapalops</i> sp.                | MNHN.F.SCZ162   | 50%MD; 35%MD; (39%TA) | -             | -      |
| <i>Lestodon armatus</i>            | MNHN.F.PAM754   | -                     | 50%MD         | -      |
| <i>Lestodon armatus</i>            | MNHN.F.PAM755   | -                     | -             | 50%MD  |
| <i>Lestodon armatus</i>            | MNHN.F.PAM95    | 100%TA                | -             | -      |
| <i>Glossotherium robustum</i>      | MNHN.F.PAM756   | QO                    | 50%MD; 100%TA | -      |
| <i>Glossotherium robustum</i>      | MNHN.F.PAM141   | -                     | -             | 50%MD  |
| <i>Scelidotherium leptcephalum</i> | MNHN.F.PAM236   | 50%MD                 | -             | -      |
| <i>Valgipes bucklandi</i>          | MNHN.F.BRD29    | -                     | -             | 50%MD  |
| <i>Megatherium americanum</i>      | MNHN.F.PAM753   | -                     | -             | 50%MD  |
| <i>Megatherium americanum</i>      | MNHN.F.PAM758   | -                     | QO            | -      |

Footnotes. Abbreviations: 'n'-MD, mid-diaphyseal data, with 'n' the position of the sampled cross-section expressed as the length percentage from the proximal end; 'n'-TA, trabecular architecture data, with 'n' the cropping coefficient that was used, if any (see Material and Methods section); QO, only qualitative observations were performed.



PREPRINT

Table 2. Mean values of diaphyseal parameters of interest for each lifestyle category and extinct taxon.

|                         | CSA (mm <sup>2</sup> ) | GC (NU) | CSS (NU) |
|-------------------------|------------------------|---------|----------|
| Mc III diaphysis, 50%MD |                        |         |          |
| Armadillos              | 26.188                 | 69.181  | 2.013    |
| Anteaters               | 56.562                 | 73.790  | 2.072    |
| Extant sloths           | 17.577                 | 62.650  | 1.940    |
| <i>Lestodon</i>         | 1239.645               | 64.056  | 1.925    |
| <i>Glossotherium</i>    | 1017.827               | 78.109  | 2.855    |
| <i>Megatherium</i>      | 2100.754               | 74.779  | 1.257    |
| <i>Valgipes</i>         | 590.903                | 69.296  | 3.835    |
| Humeral diaphysis, 50%  |                        |         |          |
| Armadillos              | 65.763                 | 68.462  | 4.443    |
| Anteaters               | 144.838                | 66.472  | 2.998    |
| Extant sloths           | 59.237                 | 72.764  | 1.202    |
| <i>Hapalops</i>         | 229.325                | 89.848  | 1.189    |
| <i>Scelidotherium</i>   | 2780.843               | 80.851  | 2.604    |
| Humeral diaphysis, 35%  |                        |         |          |
| Armadillos              | 44.231                 | 46.528  | 2.615    |
| Anteaters               | 117.554                | 57.493  | 1.845    |
| Extant sloths           | 63.013                 | 64.837  | 1.240    |
| <i>Hapalops</i>         | 235.345                | 75.282  | 1.845    |
| Radial diaphysis, 50%   |                        |         |          |
| Armadillos              | 17.185                 | 89.036  | 2.651    |
| Anteaters               | 57.970                 | 83.132  | 2.225    |
| Extant sloths           | 31.743                 | 77.222  | 2.175    |
| <i>Lestodon</i>         | 1474.742               | 71.340  | 5.030    |
| <i>Glossotherium</i>    | 788.320                | 67.652  | 4.003    |
| Radial diaphysis, 72%   |                        |         |          |
| Armadillos              | 28.369                 | 76.179  | 3.846    |
| Anteaters               | 69.146                 | 77.233  | 2.867    |
| Extant sloths           | 35.096                 | 71.261  | 5.116    |
| <i>Hapalops</i>         | 92.887                 | 79.769  | 6.320    |

Footnotes. Percentage indicates the position of the sampled cross-section, expressed as the length percentage from the proximal end. Abbreviations: NU, no units.

PREPRINT

Table 3. Mean values of trabecular parameters of interest for each lifestyle category and extinct taxon.

|                      | DA (NU) | Conn.D (nb.mm <sup>-3</sup> ) | Tb.Th (mm) | Tb.Sp (mm) | BS/TV (mm <sup>-1</sup> ) | BV/TV (NU) |
|----------------------|---------|-------------------------------|------------|------------|---------------------------|------------|
| Humeral head 100%    |         |                               |            |            |                           |            |
| Armadillos           | 0.597   | 12.349                        | 0.250      | 0.472      | 3.378                     | 0.408      |
| Anteaters            | 0.401   | 11.595                        | 0.264      | 0.414      | 3.429                     | 0.453      |
| Extant sloths        | 0.425   | 9.360                         | 0.308      | 0.494      | 3.139                     | 0.443      |
| <i>Lestodon</i>      | 0.501   | 0.584                         | 0.802      | 0.810      | 1.226                     | 0.580      |
| Humeral head 72%     |         |                               |            |            |                           |            |
| Armadillos           | 0.616   | 12.311                        | 0.242      | 0.461      | 3.566                     | 0.414      |
| Anteaters            | 0.401   | 11.377                        | 0.261      | 0.421      | 3.563                     | 0.448      |
| Extant sloths        | 0.439   | 9.027                         | 0.317      | 0.496      | 3.158                     | 0.450      |
| <i>Hapalops</i>      | 0.516   | 3.224                         | 0.386      | 0.555      | 3.389                     | 0.504      |
| Radial trochlea 100% |         |                               |            |            |                           |            |
| Armadillos           | 0.789   | 16.047                        | 0.342      | 0.372      | 3.868                     | 0.490      |
| Anteaters            | 0.629   | 11.187                        | 0.296      | 0.441      | 3.199                     | 0.440      |
| Extant sloths        | 0.565   | 8.750                         | 0.304      | 0.515      | 2.387                     | 0.400      |
| <i>Hapalops</i>      | 0.600   | 3.026                         | 0.263      | 0.847      | 1.550                     | 0.241      |
| <i>Glossotherium</i> | 0.432   | 1.018                         | 0.425      | 1.245      | 0.593                     | 0.225      |

Footnotes. Percentage indicates the cropping coefficient that was used (100% denoting the lack thereof; see Material and Methods section). Abbreviation: NU, no units.

## PREPRINT

Table 4. Lifestyle classification of the extinct taxa as predicted by phylogenetically flexible discriminant analyses (because of the difference in the included predictive variables for each taxon, a dedicated discriminant analysis was performed for each of them).

|                                     | Predicted class | P(ant) | P(arma) | P(sloth) |
|-------------------------------------|-----------------|--------|---------|----------|
| <i>Hapalops</i>                     | sloth           | 0.000  | 0.000   | 1.000    |
| <i>Lestodon armatus</i>             | arma            | 0.353  | 0.641   | 0.006    |
| <i>Glossotherium robustum</i>       | ant             | 0.505  | 0.249   | 0.246    |
| <i>Scelidotherium leptocephalum</i> | ant             | 0.367  | 0.273   | 0.360    |

Abbreviations: P("class"), the posterior probability for the extinct taxon to be classified as "class"; ant, anteater; arma, armadillo; sloth, extant sloth.

## PREPRINT

### Figure Legends

Figure 1. Timetree depicting the time-calibrated phylogenetic relationships of the xenarthrans included in the phylogenetically flexible linear discriminant analyses. See Material and Methods section for the sources used to build the timetree.

Figure 2. Qualitative observations of diaphyseal structure in xenarthrans. Longitudinal sections of humeri (A-C, E-F, all from CT-scans), tibia (D, 'natural' section), and radius (G, from CT-scan). A, *Chaetophractus vellerosus* (ZSM 1926-24); B, *Priodontes maximus* (ZSM 1931-293); C, *Myrmecophaga tridactyla* (ZMB\_MAM\_77025); D, *Nothrotherium maquinense* (MCL 2821); E, *Choloepus didactylus* (ZMB\_MAM\_35825); F, *Glossotherium robustum* (MNHN.F.TAR 767); G, *Lestodon armatus* (MNHN.F.PAM 754). Scale bars: A-E, 1 cm; F-G, 10 cm.

Figure 3. Univariate comparisons of mid-diaphyseal parameters. A, Mc III Global Compactness (GC); B, Mc III cross-sectional shape (CSS); C, humeral GC; D, humeral CSS; E, radial GC; F, radial CSS. Thresholded mid-diaphyseal virtual sections are depicted for the extinct sloths. Abbreviations: ant, anteaters; arma, armadillos; Glos, *Glossotherium*; Hapa, *Hapalops*; Lest, *Lestodon*; Meg, *Megatherium*; Sce, *Scelidotherium*; sloth, extant sloths.

Figure 4. Univariate comparisons of trabecular anisotropy parameters. A, degree of anisotropy (DA) in the humeral head ROI, reduced at 72% of its maximum size (see Material and Methods section); B, DA in the radial trochlea; C, main direction of the trabeculae (MDT) in the radial trochlea. Abbreviations: ant, anteaters; arma, armadillos; Glos, *Glossotherium*; Hapa, *Hapalops*; sloth, extant sloths.

Figure 5. Phylogenetically flexible linear discriminant analyses using humeral and radial bone structure parameters. One analysis per extinct taxon (referred as of "unknown" class) was performed, because of the difference in the parameters that could be included (see Material and Methods section and Table 1). A,



## PREPRINT

*Hapalops*; B, *Lestodon*; C, *Glossotherium*; D, *Scelidotherium*. Abbreviations: ant, anteaters; arma, armadillos; sloth, extant sloths. Next to each discriminant axis is given between brackets the corresponding percentage of explained between-group variance. The size of extinct sloths' representations gives a rough indication of their body sizes.

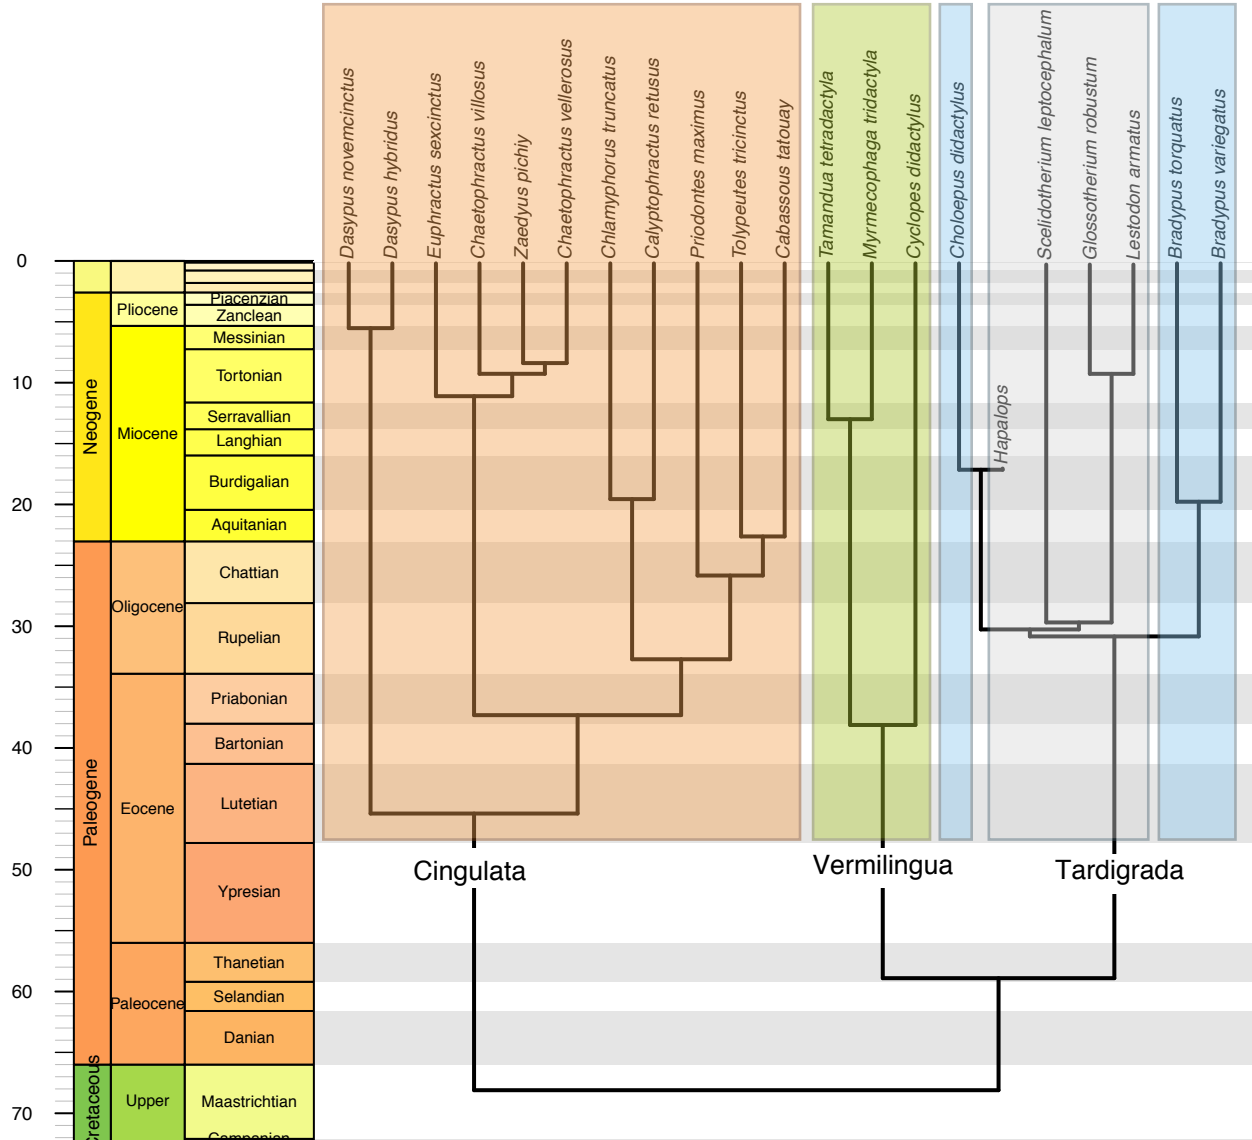

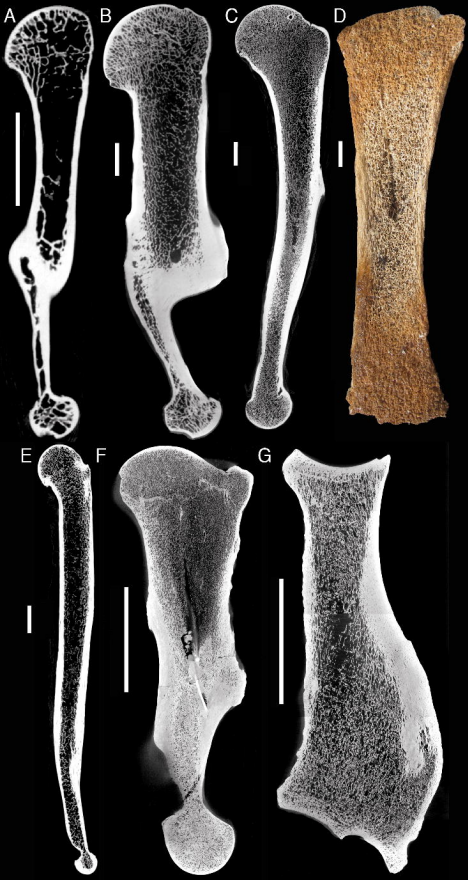

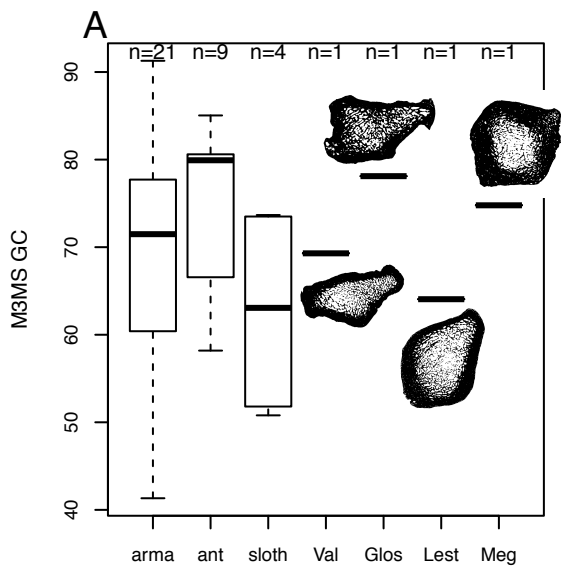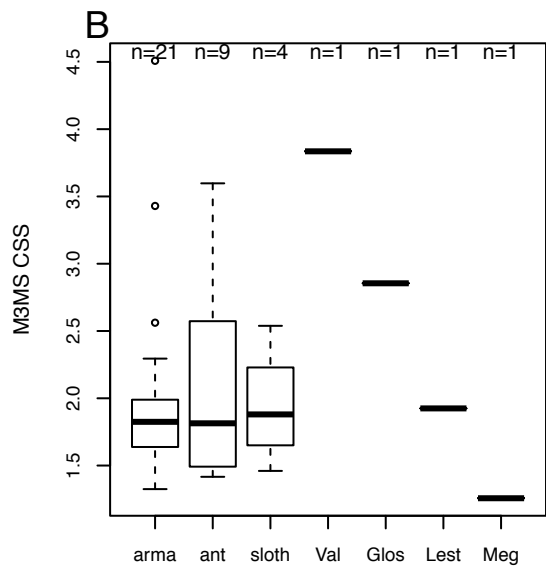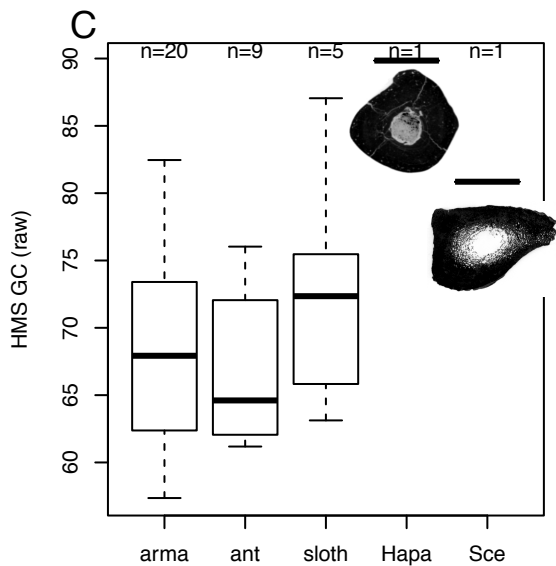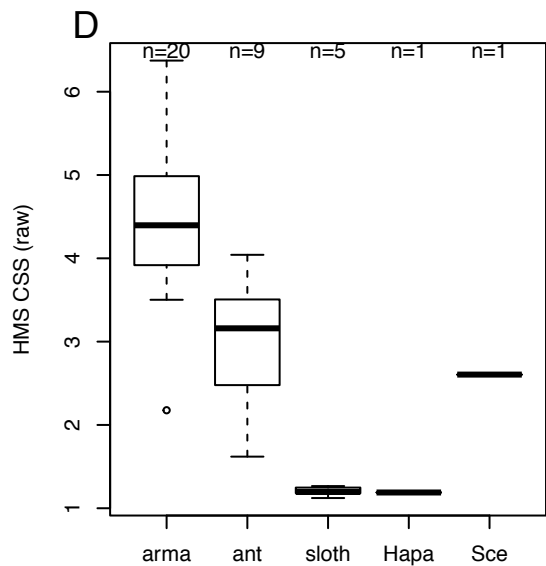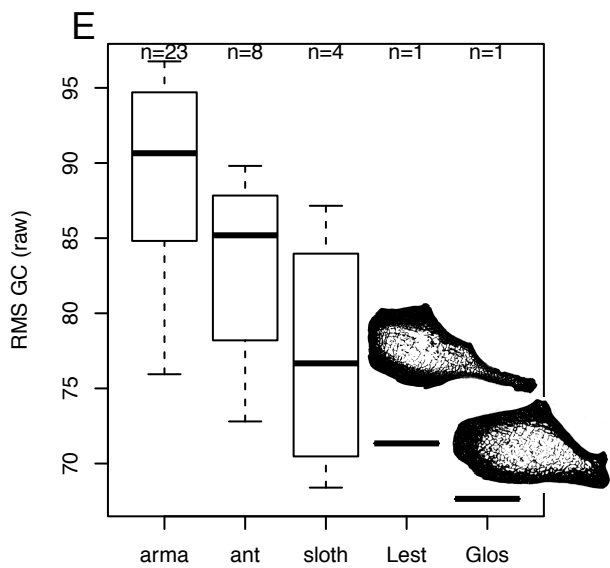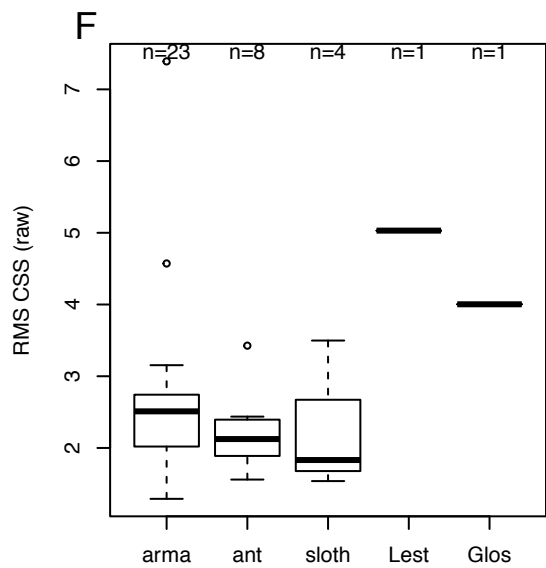



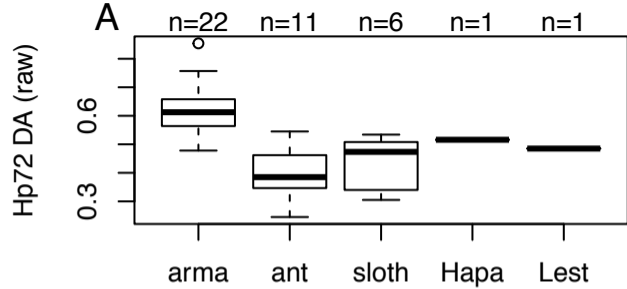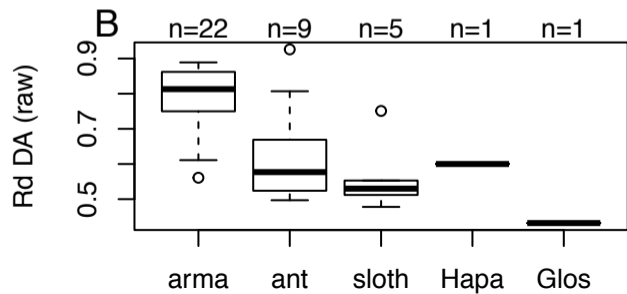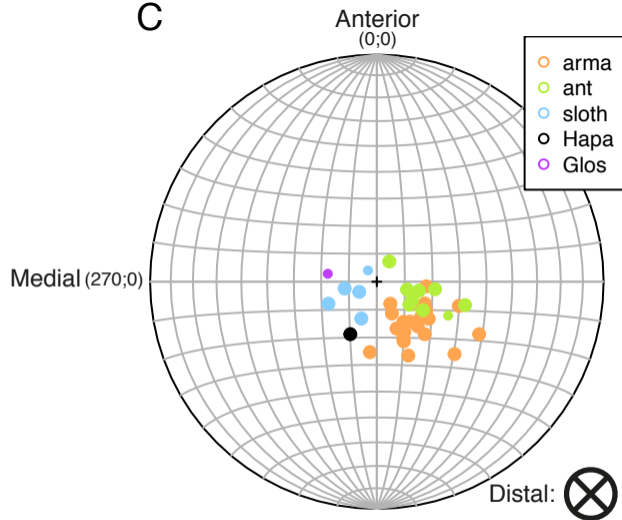

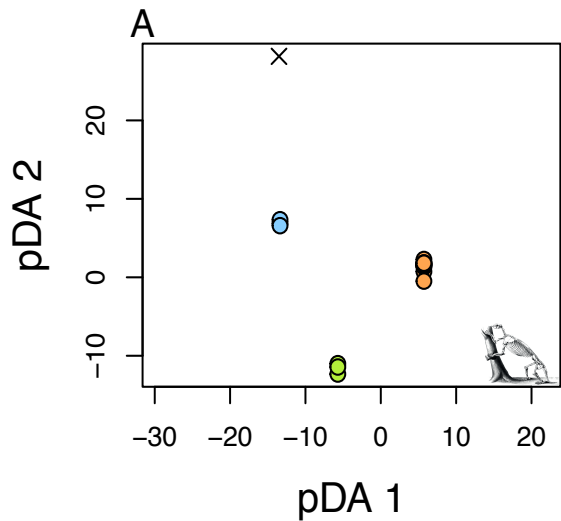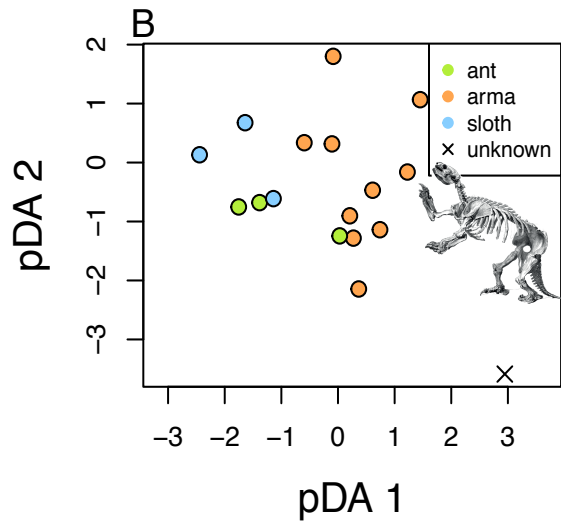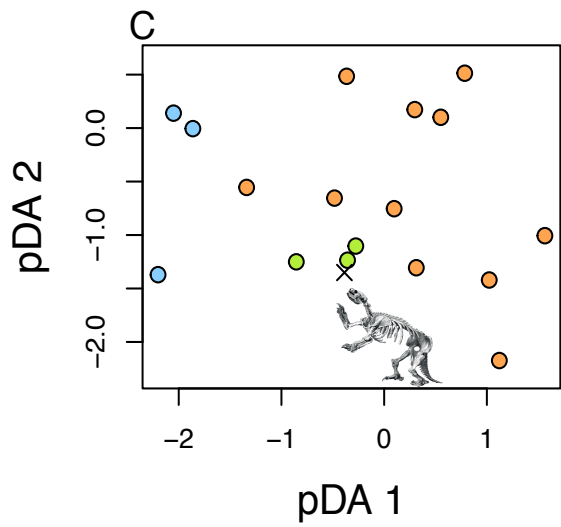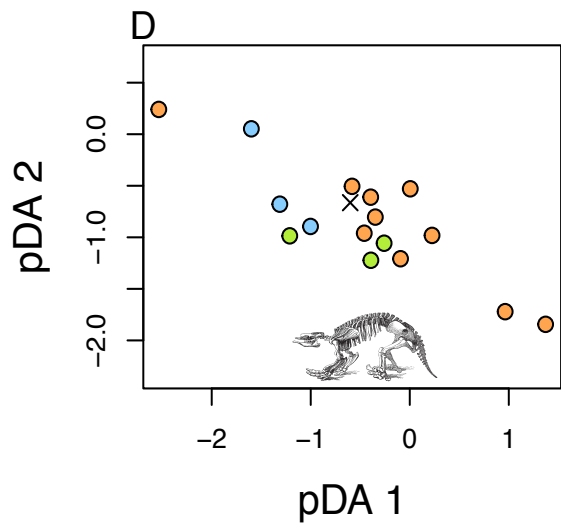

Source: https://www.biorxiv.org/content/10.1101/318121v2.full.pdf
